# Supplementary material for: Main Habitat Factors Driving the Phenotypic Diversity of Litsea cubeba in China
Source: MDPI journal article supplement (doi:10.3390/plants12213781), 2023-11-06
Supplement: s1 [file s1]

## Supplementary Materials: Main habitat factors driving the phenotypic diversity of *Litsea cubeba* in China

| NO.        | Supplementary materials name                                                                   |
|------------|------------------------------------------------------------------------------------------------|
| Table S1   | Geographical locations and climatic conditions of provenances in China                         |
| Table S2   | Variation analysis on phenotypic traits of <i>L. cubeba</i>                                    |
| Table S3   | CV of phenotypic traits within provenances of <i>L. cubeba</i>                                 |
| Table S4   | Shannon–Wiener index ( $H'$ ) of phenotypic traits within provenances of <i>L. cubeba</i>      |
| Table S5   | Nested variance analysis for phenotypic traits of <i>L. cubeba</i>                             |
| Table S6   | Multiple comparison on leaf and growth characteristics between provenances of <i>L. cubeba</i> |
| Table S7   | Multiple comparison on fruit characteristics between provenances of <i>L. cubeba</i>           |
| Table S8   | The result of path analysis for LA of <i>L. cubeba</i>                                         |
| Table S9   | The result of path analysis for LSI of <i>L. cubeba</i>                                        |
| Table S10  | The result of path analysis for TFW of <i>L. cubeba</i>                                        |
| Table S11  | The result of path analysis for FFPR of <i>L. cubeba</i>                                       |
| Table S12  | The result of path analysis for FY of <i>L. cubeba</i>                                         |
| Table S13  | The result of path analysis for FY/BD of <i>L. cubeba</i>                                      |
| Table S14  | The result of path analysis for EOC of <i>L. cubeba</i>                                        |
| Table S15  | The result of path analysis for EOY of <i>L. cubeba</i>                                        |
| Table S16. | The result of path analysis for EOY/BD of <i>L. cubeba</i>                                     |
| Table S17. | Results on detrended correspondence analysis of environmental factors                          |
| Table S18  | Results on detrended correspondence analysis of environmental factors                          |

**Table S1. Geographical locations and climatic conditions of provenances in China**

| Provenance                 | County acronym | Sample size | Latitude (°N) | Longitude (°E) | Elevation (m) | AAT (°C) | AAMaxT (°C) | AAMinT (°C) | AARH (%) | AAR (mm) |
|----------------------------|----------------|-------------|---------------|----------------|---------------|----------|-------------|-------------|----------|----------|
| Dongzhi County, Anhui      | AH-DZ          | 18          | 30°11'19.72"  | 117°14'19.64"  | 313.8         | 17.1     | 21.2        | 14.0        | 76.0     | 1485.2   |
| Jixi County, Anhui         | AH-JX          | 25          | 29°58'24.17"  | 118°31'56.21"  | 169.5         | 16.1     | 22.1        | 11.9        | 82.0     | 1797.6   |
| Qimen County, Anhui        | AH-QM          | 21          | 29°51'25.85"  | 117°47'07.51"  | 221.4         | 16.6     | 20.9        | 13.3        | 77.0     | 1392.5   |
| Qingyang County, Anhui     | AH-QY          | 10          | 30°40'35.51"  | 117°49'05.23"  | 57.9          | 16.5     | 21.7        | 12.5        | 78.0     | 1747.9   |
| Xiuning County, Anhui      | AH-XN          | 25          | 29°50'46.75"  | 118°10'34.03"  | 402.3         | 16.6     | 22.0        | 12.6        | 76.0     | 1652.4   |
| Changting County, Fujian   | FJ-CT          | 17          | 25°01'04.15"  | 116°19'41.12"  | 528.8         | 18.5     | 24.2        | 14.6        | 80.0     | 1712.1   |
| Jianou County, Fujian      | FJ-JO          | 20          | 27°02'44.02"  | 118°07'53.36"  | 277.5         | 19.1     | 24.8        | 15.2        | 81.0     | 1673.6   |
| Liancheng County, Fujian   | FJ-LC          | 25          | 25°24'14.94"  | 116°10'57.22"  | 481.0         | 20.3     | 25.9        | 16.7        | 76.0     | 1666.9   |
| Shaxian County, Fujian     | FJ-SX          | 24          | 26°27'37.69"  | 117°43'50.05"  | 208.1         | 19.6     | 25.5        | 15.7        | 81.0     | 1692.2   |
| Zhenghe County, Fujian     | FJ-ZH          | 17          | 27°22'47.28"  | 118°38'56.69"  | 545.0         | 18.8     | 24.6        | 14.8        | 77.0     | 1628.2   |
| Guangyang County, Guangxi  | GX-GY          | 22          | 25°29'37.54"  | 111°13'46.74"  | 590.8         | 18.0     | 22.7        | 14.7        | 79.0     | 1542.9   |
| Dafang County, Guizhou     | GZ-BL          | 22          | 27°18'05.51"  | 105°52'14.52"  | 1949.9        | 12.1     | 16.1        | 9.3         | 84.0     | 1085.4   |
| Taijiang County, Guizhou   | GZ-TJ          | 25          | 26°28'23.63"  | 108°19'40.94"  | 747.2         | 15.9     | 21.2        | 12.3        | 81.0     | 1096.7   |
| zhenfeng County, Guizhou   | GZ-ZF          | 22          | 25°21'16.06"  | 105°32'20.54"  | 1522.7        | 16.6     | 20.6        | 13.7        | 79.0     | 1318.1   |
| zhijin County, Guizhou     | GZ-ZJ          | 25          | 26°35'57.48"  | 105°42'38.56"  | 1632.0        | 14.3     | 18.6        | 11.3        | 81.0     | 1355.4   |
| ziyun County, Guizhou      | GZ-ZY          | 25          | 25°54'52.16"  | 106°07'22.73"  | 1224.2        | 15.5     | 19.9        | 12.4        | 80.0     | 1250.1   |
| Daoxian County, Hunan      | HN-DX          | 25          | 25°47'36.31"  | 111°30'14.65"  | 706.1         | 18.8     | 23.1        | 15.6        | 78.0     | 1503.5   |
| Dexing County, Jiangxi     | JX-DX          | 6           | 28°49'36.62"  | 117°25'22.22"  | 81.0          | 17.7     | 23.2        | 13.7        | 81.0     | 1955.5   |
| Wannian County, Jiangxi    | JX-WN          | 25          | 28°43'42.89"  | 116°58'04.55"  | 81.6          | 17.8     | 23.0        | 14.1        | 81.0     | 1862.9   |
| Wuyuan County, Jiangxi     | JX-WY          | 14          | 29°19'17.33"  | 118°01'01.52"  | 265.1         | 17.1     | 23.1        | 13.0        | 82.0     | 1946.9   |
| Wanzai County, Jiangxi     | JX-WZ          | 19          | 28°12'38.34"  | 114°20'42.47"  | 169.1         | 17.5     | 22.6        | 14.0        | 82.0     | 1722.7   |
| Yuanzhou County, Jiangxi   | JX-YZ          | 26          | 27°57'21.82"  | 114°13'30.25"  | 271.1         | 17.5     | 22.2        | 14.0        | 80.0     | 1631.4   |
| Hejiang County, Sichuan    | SC-HJ          | 24          | 28°53'14.14"  | 106°13'18.30"  | 950.4         | 18.0     | 21.8        | 15.3        | 84.0     | 1122.2   |
| Kaijiang County, Sichuan   | SC-KJ          | 25          | 30°52'49.87"  | 107°53'57.84"  | 476.8         | 16.7     | 21.0        | 13.5        | 80.0     | 1238.0   |
| Lingshui County, Sichuan   | SC-LS          | 24          | 30°07'24.82"  | 107°04'06.38"  | 493.0         | 17.0     | 21.1        | 14.1        | 84.0     | 1215.0   |
| Lancang County, Yunnan     | YN-LC          | 9           | 22°25'36.52"  | 99°48'42.41"   | 1552.8        | 19.7     | 27.5        | 14.8        | 77.0     | 1586.5   |
| Maguang County, Yunnan     | YN-MG          | 23          | 23°01'40.08"  | 104°27'37.55"  | 1408.0        | 17.2     | 22.2        | 14.1        | 83.0     | 1286.3   |
| Menghai County, Yunnan     | YN-MH          | 25          | 22°02'24.25"  | 100°50'19.07"  | 1190.8        | 18.9     | 26.2        | 14.0        | 79.0     | 1318.5   |
| Mojiang County, Yunnan     | YN-MJ          | 25          | 22°58'23.30"  | 101°49'06.78"  | 1853.7        | 18.4     | 24.9        | 14.0        | 77.0     | 1306.0   |
| Simao County, Yunnan       | YN-SM          | 15          | 22°37'03.29"  | 100°50'44.23"  | 1677.2        | 16.3     | 21.0        | 13.1        | 83.0     | 1270.6   |
| Xichou County, Yunnan      | YN-XC          | 17          | 23°33'13.97"  | 104°44'29.29"  | 1707.5        | 18.9     | 25.2        | 14.8        | 77.0     | 1470.5   |
| Jiangshan County, Zhejiang | ZJ-JS          | 20          | 28°17'25.26"  | 118°34'17.26"  | 851.6         | 17.4     | 22.1        | 13.9        | 79.0     | 1753.8   |
| Liandu County, Zhejiang    | ZJ-LD          | 23          | 28°27'22.64"  | 119°59'40.16"  | 501.7         | 18.4     | 23.8        | 14.5        | 75.0     | 1406.0   |
| Longyou County, Zhejiang   | ZJ-LY          | 16          | 29°13'14.88"  | 119°04'32.34"  | 701.9         | 17.4     | 22.2        | 13.7        | 77.0     | 1633.0   |
| Qingyuan County, Zhejiang  | ZJ-QY          | 22          | 27°44'35.05"  | 119°10'28.31"  | 1140.6        | 18.0     | 23.7        | 13.8        | 77.0     | 1746.9   |
| Suichuan County, Zhejiang  | ZJ-SC          | 24          | 28°44'28.21"  | 119°23'31.67"  | 992.9         | 17.1     | 22.9        | 13.0        | 78.0     | 1579.1   |

AAT, Annual average temperature; AAMaxT, Annual average maximum temperature; AAMinT, annual average minimum temperature; AARH, annual average relative humidity; AAR, annual average rainfall;

**Table S2. Variation analysis on phenotypic traits of *L. cubeba***

| <b>Traits</b>                 | <b>Mean <math>\pm</math> SE</b> | <b>SD</b> | <b>Range</b> | <b>CV (%)</b> | <b>Shannon–Wiener index (<i>H'</i>)</b> |
|-------------------------------|---------------------------------|-----------|--------------|---------------|-----------------------------------------|
| BD (mm)                       | 64.35 $\pm$ 1.48                | 40.53     | 380.23       | 62.98         | 1.85                                    |
| CD (m <sup>2</sup> )          | 7.43 $\pm$ 0.25                 | 6.86      | 75.70        | 92.33         | 1.70                                    |
| TH (m)                        | 5.1 $\pm$ 0.08                  | 2.10      | 15.10        | 41.18         | 2.01                                    |
| EOC (%)                       | 3.07 $\pm$ 0.05                 | 0.84      | 5.08         | 27.36         | 2.07                                    |
| EOY (g)                       | 74.33 $\pm$ 7.54                | 118.98    | 896.73       | 160.07        | 1.29                                    |
| EOY/BD (g. cm <sup>-1</sup> ) | 9.72 $\pm$ 0.95                 | 14.92     | 126.57       | 153.50        | 1.33                                    |
| FPKR                          | 3.83 $\pm$ 0.05                 | 1.35      | 9.60         | 35.25         | 1.91                                    |
| FFPR (%)                      | 77.86 $\pm$ 0.2                 | 5.57      | 43.80        | 7.15          | 2.06                                    |
| FY (kg)                       | 1.38 $\pm$ 0.11                 | 3.02      | 44.72        | 218.84        | 0.79                                    |
| FY/BD (g.cm <sup>-1</sup> )   | 0.2 $\pm$ 0.01                  | 0.36      | 5.43         | 180.00        | 1.04                                    |
| LA (cm <sup>2</sup> )         | 3.38 $\pm$ 0.03                 | 0.58      | 5.15         | 17.16         | 1.88                                    |
| LL (cm)                       | 8.25 $\pm$ 0.11                 | 1.95      | 13.32        | 23.64         | 2.06                                    |
| LP (cm)                       | 21.95 $\pm$ 0.18                | 3.09      | 18.00        | 14.08         | 1.97                                    |
| PL (cm)                       | 2.52 $\pm$ 0.04                 | 0.77      | 4.62         | 30.56         | 2.05                                    |
| LSI                           | 1.07 $\pm$ 0.02                 | 0.28      | 1.73         | 26.17         | 1.97                                    |
| LV                            | 51.12 $\pm$ 0.48                | 13.08     | 97.22        | 25.59         | 2.00                                    |
| LW (cm)                       | 131.57 $\pm$ 1.1                | 30.11     | 190.62       | 22.89         | 1.95                                    |
| TDW (g)                       | 14.78 $\pm$ 0.45                | 7.86      | 54.65        | 53.18         | 2.03                                    |
| TFW (g)                       | 18.55 $\pm$ 0.41                | 7.14      | 37.42        | 38.49         | 2.03                                    |
| FWC (%)                       | 60.34 $\pm$ 0.34                | 9.22      | 71.20        | 15.28         | 2.05                                    |

BD, Basal diameter; CD, Crown diameter; TH, Diameter height; EOC, Essential oil content; EOY, Essential oil yield; EOY/BD, Essential oil yield/ Basal diameter; FPKR, Fresh pulp kernel ratio; FFPR, Fresh fruit pulp rate; FWC, Water content of fruit; FY, fresh fruit yield; FY/BD, Fruit yield/ Basal diameter; TFW, Thousand-grain fresh weight; TDW, Thousand-grain dry weight; LA, Leaf area; LL, Leaf length; LW, Leaf width; LP, Leaf perimeter; PL, Petiole length; LSI, Leaf shape index; LV, Number of leaf veins; Mean, mean value; SE, standard error; SD, standard deviation ( $\delta$ ); CV, coefficients of variation, CV=SD /Mean $\times$ 100%; Shannon–Wiener index (*H'*) was calculated by the method as described by [Hamil et al. \(2021\)](#).

**Table S3. CV (%) of phenotypic traits within provenances of *L. cubeba***

| Provenance | BD    | CD     | TH    | EOC   | EOY    | EOY/BD | FPKR  | FFPR  | FY     | FY/BD  | LA    | LL    | LP    | PL    | LSI   | LV    | LW    | TDW   | TFW   | FWC   |
|------------|-------|--------|-------|-------|--------|--------|-------|-------|--------|--------|-------|-------|-------|-------|-------|-------|-------|-------|-------|-------|
| AH-DZ      | 69.62 | 59.65  | 33.03 | 25.26 | 49.85  | 85.78  | 20.53 | 4.85  | 84.05  | 110.03 | 22.00 | 10.87 | 14.17 | 14.86 | 2.55  | 15.08 | 19.95 | 19.53 | 20.71 | 16.04 |
| AH-JX      | 50.53 | 87.20  | 16.95 | 22.45 | 30.74  | 58.74  | 36.51 | 10.91 | 76.94  | 69.35  | 16.21 | 6.66  | 4.83  | 7.33  | 14.85 | 8.58  | 12.71 | 28.20 | 29.28 | 19.37 |
| AH-QM      | 83.41 | 60.10  | 22.64 | 13.02 | 44.18  | 70.00  | 26.98 | 4.95  | 65.80  | 90.97  | 16.49 | 9.65  | 12.70 | 11.07 | 9.66  | 11.95 | 19.89 | 17.85 | 19.88 | 9.66  |
| AH-QY      | 46.94 | 64.15  | 23.65 | 15.17 | 58.88  | 79.61  | 31.18 | 5.33  | 93.68  | 85.32  | 7.88  | 4.00  | 4.96  | 5.85  | 11.28 | 2.08  | 25.90 | 12.89 | 13.15 | 8.70  |
| AH-XN      | 73.01 | 69.06  | 31.72 | 23.35 | 33.45  | 49.21  | 38.90 | 6.04  | 124.89 | 67.68  | 26.78 | 12.52 | 5.10  | 14.89 | 6.80  | 13.43 | 19.33 | 18.28 | 17.38 | 11.21 |
| FJ-CT      | 46.70 | 66.25  | 17.58 | 23.16 | 60.45  | 52.32  | 22.10 | 5.15  | 68.83  | 43.58  | 41.53 | 14.51 | 11.60 | 19.45 | 6.95  | 23.93 | 20.61 | 15.77 | 12.91 | 8.38  |
| FJ-JO      | 41.29 | 59.75  | 23.75 | 9.08  | 34.02  | 21.74  | 26.34 | 6.50  | 73.25  | 50.09  | 31.99 | 17.53 | 6.12  | 18.08 | 15.03 | 16.62 | 19.23 | 14.34 | 17.16 | 6.61  |
| FJ-LC      | 37.68 | 63.89  | 26.13 | 4.25  | 24.34  | 33.17  | 24.65 | 5.76  | 100.38 | 79.87  | 29.81 | 18.80 | 8.38  | 19.95 | 14.67 | 17.24 | 24.83 | 20.26 | 15.15 | 10.88 |
| FJ-SX      | 42.24 | 61.26  | 25.50 | 23.02 | 72.95  | 74.60  | 22.92 | 4.69  | 84.99  | 80.85  | 16.43 | 10.97 | 8.77  | 8.06  | 6.35  | 10.65 | 19.06 | 17.64 | 12.58 | 10.89 |
| FJ-ZH      | 59.28 | 132.76 | 26.69 | —     | —      | —      | 34.34 | 6.56  | 187.59 | 112.51 | 25.59 | 12.25 | 16.20 | 11.31 | 9.30  | 17.65 | 16.64 | 18.97 | 16.60 | 10.44 |
| GX-GY      | 46.18 | 71.53  | 22.95 | 14.52 | 71.14  | 65.92  | 21.89 | 5.29  | 113.07 | 90.32  | 41.60 | 17.32 | 19.84 | 18.94 | 7.32  | 27.37 | 18.23 | 16.76 | 16.62 | 10.41 |
| GZ-BL      | 69.56 | 92.82  | 32.34 | 12.96 | 100.46 | 83.18  | 16.44 | 3.16  | 158.16 | 92.58  | 14.47 | 9.44  | 12.19 | 10.85 | 7.11  | 7.24  | 13.51 | 13.52 | 18.73 | 6.16  |
| GZ-TJ      | 39.33 | 71.39  | 19.77 | 22.55 | 66.65  | 63.25  | 16.98 | 4.22  | 107.29 | 96.77  | 21.32 | 9.71  | 11.02 | 10.12 | 10.22 | 14.35 | 16.81 | 19.92 | 19.60 | 8.08  |
| GZ-ZF      | 54.17 | 111.90 | 67.09 | 10.71 | 146.08 | 81.05  | 20.87 | 4.44  | 145.53 | 96.84  | 39.01 | 18.96 | 13.97 | 19.30 | 8.25  | 22.42 | 19.97 | 20.89 | 15.72 | 11.28 |
| GZ-ZJ      | 51.24 | 69.10  | 37.30 | 29.60 | 158.98 | 103.28 | 20.63 | 3.98  | 131.25 | 105.77 | 69.85 | 28.37 | 17.51 | 27.74 | 15.09 | 41.98 | 35.44 | 14.68 | 19.03 | 6.10  |
| GZ-ZY      | 58.17 | 125.30 | 47.27 | 20.87 | 95.06  | 94.12  | 23.29 | 5.41  | 139.38 | 122.55 | 34.98 | 15.41 | 10.69 | 15.86 | 11.99 | 21.16 | 19.97 | 13.65 | 13.99 | 5.81  |
| HN-DX      | 42.95 | 55.64  | 23.05 | 15.51 | 34.57  | 51.44  | 30.30 | 6.29  | 50.45  | 47.77  | 22.49 | 11.76 | 5.13  | 12.23 | 9.14  | 10.98 | 11.91 | 26.11 | 20.84 | 14.15 |
| JX-DX      | 58.65 | 100.49 | 37.90 | 6.69  | 28.70  | 86.53  | 16.60 | 3.52  | 71.77  | 102.29 | 19.02 | 7.39  | 16.95 | 8.09  | 12.31 | 14.44 | 2.14  | 19.29 | 16.92 | 2.50  |
| JX-WN      | 45.95 | 56.55  | 32.09 | 20.23 | 97.86  | 55.46  | 26.36 | 5.89  | 105.45 | 69.01  | 27.55 | 11.58 | 13.81 | 13.13 | 12.77 | 15.40 | 14.97 | 19.24 | 24.77 | 11.06 |
| JX-WY      | 31.74 | 41.49  | 20.23 | 3.27  | 98.89  | 75.70  | 28.54 | 4.98  | 122.02 | 104.61 | 20.42 | 8.01  | 26.00 | 7.97  | 8.33  | 20.46 | 14.42 | 16.94 | 13.30 | 7.16  |
| JX-WZ      | 26.60 | 53.81  | 37.04 | 27.40 | 62.32  | 51.79  | 33.54 | 4.57  | 113.63 | 89.89  | 26.95 | 10.73 | 24.19 | 11.95 | 17.46 | 20.84 | 15.93 | 24.05 | 19.49 | 6.29  |
| JX-YZ      | 43.57 | 102.41 | 27.14 | 22.09 | 50.09  | 38.97  | 14.60 | 3.30  | 93.20  | 72.82  | 28.22 | 15.32 | 11.64 | 15.54 | 12.20 | 17.54 | 21.08 | 16.24 | 14.56 | 6.98  |
| SC-HJ      | 20.36 | 131.84 | 24.07 | 12.36 | 54.60  | 51.87  | 23.18 | 4.80  | 62.85  | 56.25  | 38.96 | 19.06 | 13.52 | 19.16 | 11.94 | 23.39 | 11.37 | 11.39 | 13.09 | 5.51  |
| SC-KJ      | 36.75 | 59.72  | 23.14 | 18.08 | 121.21 | 102.77 | 27.01 | 9.16  | 177.30 | 146.50 | 20.62 | 11.36 | 8.88  | 12.02 | 10.52 | 9.67  | 19.75 | 18.76 | 27.06 | 26.77 |
| SC-LS      | 38.19 | 57.35  | 33.05 | 22.08 | 101.54 | 91.97  | 27.06 | 5.83  | 115.82 | 88.18  | 34.39 | 15.53 | 16.56 | 14.92 | 13.65 | 22.83 | 26.65 | 19.85 | 20.04 | 11.05 |
| YN-LC      | 17.29 | 32.22  | 23.89 | 31.02 | 184.29 | 179.31 | 18.84 | 2.65  | 230.06 | 226.45 | 26.79 | 16.67 | 15.43 | 21.37 | 19.43 | 10.95 | 26.80 | 32.79 | 14.25 | 7.46  |
| YN-MG      | 39.90 | 53.09  | 30.20 | 39.94 | 131.67 | 114.89 | 23.97 | 4.69  | 158.56 | 141.99 | 65.05 | 22.81 | 9.19  | 28.08 | 11.16 | 29.18 | 24.57 | 18.47 | 16.21 | 8.31  |
| YN-MH      | 36.30 | 43.42  | 42.61 | 17.84 | 69.34  | 66.95  | 22.31 | 3.81  | 96.72  | 85.42  | 19.15 | 9.76  | 5.24  | 10.53 | 11.33 | 10.90 | 14.87 | 29.73 | 19.20 | 6.81  |
| YN-MJ      | 43.17 | 83.84  | 24.22 | 12.11 | 42.77  | 27.98  | 25.25 | 5.89  | 71.90  | 54.55  | 38.71 | 21.78 | 20.44 | 24.22 | 6.65  | 23.32 | 15.06 | 15.49 | 14.04 | 2.51  |
| YN-SM      | 57.96 | 58.31  | 36.98 | 12.61 | 85.29  | 101.94 | 31.54 | 5.55  | 137.77 | 131.84 | 40.27 | 23.90 | 10.23 | 24.74 | 5.72  | 20.00 | 17.99 | 24.79 | 10.71 | 7.08  |
| YN-XC      | 31.98 | 49.95  | 25.83 | 17.12 | 178.51 | 167.44 | 25.05 | 5.72  | 286.46 | 268.64 | 21.20 | 9.82  | 11.88 | 9.14  | 9.98  | 15.65 | 18.68 | 19.46 | 17.22 | 5.16  |
| ZJ-JS      | 53.36 | 115.38 | 37.16 | —     | —      | —      | 26.06 | 5.47  | 52.34  | 85.88  | 31.78 | 39.55 | 19.82 | 11.76 | 13.79 | 23.10 | 10.49 | 19.39 | 15.70 | 13.73 |
| ZJ-LD      | 49.97 | 65.35  | 30.14 | 21.06 | 29.11  | 46.56  | 25.44 | 9.11  | 75.03  | 61.64  | 19.83 | 13.69 | 10.68 | 14.79 | 10.06 | 8.73  | 19.12 | 30.12 | 32.67 | 6.24  |
| ZJ-LY      | 66.41 | 94.01  | 23.50 | 18.72 | 57.19  | 59.15  | 12.32 | 3.46  | 81.04  | 70.10  | 37.90 | 19.20 | 10.65 | 19.45 | 11.02 | 18.63 | 16.62 | 14.24 | 16.31 | 9.03  |
| ZJ-QY      | 30.10 | 36.05  | 23.76 | 16.12 | 16.19  | 31.76  | 17.43 | 4.02  | 55.88  | 55.08  | 25.32 | 20.27 | 28.28 | 19.65 | 14.33 | 18.36 | 12.94 | 15.71 | 14.96 | 6.40  |
| ZJ-SC      | 68.07 | 74.78  | 34.30 | 12.82 | 38.54  | 84.02  | 28.03 | 6.36  | 75.32  | 84.11  | 25.38 | 13.79 | 11.32 | 14.76 | 11.29 | 14.14 | 18.37 | 20.58 | 14.86 | 12.98 |
| Mean       | 47.46 | 73.11  | 29.57 | 18.15 | 74.41  | 73.60  | 24.67 | 5.34  | 110.80 | 95.50  | 29.05 | 14.97 | 13.00 | 15.20 | 10.85 | 17.23 | 18.22 | 19.33 | 17.63 | 9.37  |

BD, Basal diameter; CD, Crown diameter; TH, Diameter height; EOC, Essential oil content; EOY, Essential oil yield; EOY/BD, Essential oil yield/ Basal diameter; FPKR, Fresh pulp kernel ratio; FFPR, Fresh fruit pulp rate; FWC, Water content of fruit; FY, fresh fruit yield; FY/BD, Fruit yield/ Basal diameter; TFW, Thousand-grain fresh weight; TDW, Thousand-grain dry weight; LA, Leaf area; LL, Leaf length; LW, Leaf width; LP, Leaf perimeter; PL, Petiole length; LSI, Leaf shape index; LV, Number of leaf veins; CV, coefficients of variation, CV=SD/Mean×100%.

**Table S4. Shannon–Wiener index ( $H'$ ) of phenotypic traits within provenances of *L. cubeba***

| Provenance | BD   | CD   | TH   | EOC  | EOY  | EOY/BD | FPKR | FFPR | FY   | FY/BD | LA   | LL   | LP   | PL   | LSI  | LV   | LW   | TDW  | TFW  | FWC  |
|------------|------|------|------|------|------|--------|------|------|------|-------|------|------|------|------|------|------|------|------|------|------|
| AH-DZ      | 1.83 | 1.83 | 1.74 | 1.73 | 1.49 | 1.21   | 1.98 | 1.98 | 1.27 | 1.46  | 1.72 | 1.42 | 1.49 | 1.36 | 1.49 | 1.10 | 1.49 | 1.67 | 1.99 | 1.64 |
| AH-JX      | 1.83 | 1.70 | 1.84 | 1.70 | 1.83 | 1.47   | 1.79 | 1.85 | 1.84 | 1.90  | 1.43 | 1.47 | 1.61 | 1.61 | 1.61 | 1.30 | 1.61 | 1.61 | 1.72 | 1.93 |
| AH-QM      | 1.43 | 1.77 | 1.88 | 1.56 | 1.61 | 1.89   | 1.84 | 2.02 | 1.78 | 1.55  | 1.84 | 1.70 | 1.42 | 1.83 | 1.56 | 1.70 | 1.70 | 1.64 | 1.82 | 1.86 |
| AH-QY      | 1.75 | 1.70 | 1.50 | 1.04 | 1.04 | 1.04   | 1.28 | 1.50 | 1.36 | 1.22  | 1.70 | 1.04 | 1.39 | 0.69 | 1.04 | 1.04 | 1.39 | 1.04 | 1.83 | 1.47 |
| AH-XN      | 1.42 | 1.78 | 1.83 | 1.39 | 1.39 | 1.39   | 1.62 | 1.97 | 1.40 | 1.43  | 1.92 | 1.83 | 1.75 | 1.61 | 1.42 | 1.54 | 1.61 | 1.56 | 1.91 | 1.71 |
| FJ-CT      | 1.59 | 1.81 | 1.79 | 1.10 | 1.10 | 1.10   | 1.78 | 1.81 | 1.68 | 2.01  | 1.82 | 1.79 | 1.56 | 1.33 | 1.01 | 1.10 | 1.33 | 1.24 | 1.96 | 1.96 |
| FJ-JO      | 1.70 | 1.85 | 1.87 | 1.61 | 1.61 | 1.33   | 2.04 | 1.69 | 1.85 | 1.99  | 2.00 | 1.74 | 1.74 | 1.74 | 1.68 | 1.74 | 1.68 | 1.89 | 1.87 | 1.85 |
| FJ-LC      | 1.70 | 1.87 | 1.85 | 1.10 | 0.64 | 1.10   | 1.94 | 1.87 | 1.51 | 1.70  | 1.93 | 1.50 | 1.61 | 1.36 | 1.36 | 1.49 | 1.61 | 1.63 | 1.84 | 1.87 |
| FJ-SX      | 1.59 | 1.93 | 1.70 | 1.50 | 1.28 | 1.22   | 1.91 | 1.99 | 1.71 | 1.64  | 2.02 | 1.70 | 1.64 | 1.61 | 1.70 | 1.98 | 1.56 | 1.70 | 1.72 | 1.79 |
| FJ-ZH      | 1.25 | 1.40 | 1.96 | —    | —    | —      | 1.56 | 1.84 | 0.79 | 1.48  | 1.87 | 1.89 | 1.70 | 1.70 | 1.50 | 1.70 | 1.50 | 1.70 | 1.72 | 1.99 |
| GX-GY      | 1.95 | 1.44 | 1.51 | 1.55 | 1.55 | 1.48   | 1.78 | 1.71 | 1.36 | 1.73  | 1.86 | 1.55 | 1.35 | 1.35 | 1.08 | 1.28 | 1.55 | 1.55 | 1.92 | 1.80 |
| GZ-BL      | 1.59 | 1.57 | 1.89 | 1.55 | 1.28 | 1.28   | 1.87 | 1.96 | 1.16 | 1.49  | 1.84 | 1.28 | 1.55 | 1.48 | 1.48 | 1.28 | 1.48 | 1.31 | 1.90 | 1.83 |
| GZ-TJ      | 1.83 | 1.90 | 2.00 | 1.64 | 1.47 | 1.50   | 1.92 | 1.94 | 1.52 | 1.48  | 1.83 | 1.50 | 1.64 | 1.56 | 1.70 | 1.70 | 1.47 | 1.70 | 1.70 | 1.86 |
| GZ-ZF      | 1.75 | 1.45 | 1.31 | 1.48 | 1.28 | 1.75   | 1.85 | 1.90 | 1.40 | 1.43  | 2.01 | 1.55 | 1.75 | 1.55 | 1.35 | 1.50 | 1.75 | 1.55 | 1.97 | 1.74 |
| GZ-ZJ      | 1.84 | 1.80 | 1.93 | 1.83 | 1.17 | 1.28   | 1.95 | 1.93 | 1.47 | 1.48  | 1.95 | 1.50 | 1.89 | 1.50 | 1.47 | 1.70 | 1.67 | 1.42 | 1.98 | 1.96 |
| GZ-ZY      | 1.70 | 1.51 | 1.73 | 1.30 | 1.30 | 1.52   | 1.90 | 2.03 | 1.48 | 1.54  | 1.84 | 1.74 | 1.89 | 1.74 | 1.31 | 1.68 | 1.74 | 1.74 | 1.99 | 2.00 |
| HN-DX      | 1.91 | 1.86 | 1.90 | 1.75 | 1.83 | 1.47   | 1.69 | 1.84 | 1.82 | 1.78  | 1.91 | 1.56 | 1.75 | 1.83 | 1.70 | 1.61 | 1.50 | 1.70 | 1.83 | 1.94 |
| JX-DX      | 1.33 | 1.24 | 1.79 | 1.04 | 1.39 | 1.04   | 1.56 | 1.79 | 1.56 | 1.01  | 1.01 | 1.04 | 1.39 | 1.04 | 1.04 | 1.04 | 1.04 | 1.04 | 1.24 | 1.79 |
| JX-WN      | 1.70 | 1.81 | 1.92 | 1.50 | 1.42 | 1.83   | 1.83 | 1.96 | 1.45 | 1.77  | 1.92 | 1.61 | 1.89 | 1.70 | 1.50 | 1.36 | 1.50 | 1.70 | 1.93 | 1.93 |
| JX-WY      | 1.63 | 1.85 | 1.81 | 1.10 | 1.10 | 1.10   | 1.83 | 2.01 | 1.13 | 1.35  | 1.48 | 1.10 | 1.10 | 1.10 | 1.10 | 1.79 | 1.10 | 1.10 | 1.81 | 1.83 |
| JX-WZ      | 1.99 | 1.73 | 1.59 | 1.55 | 1.15 | 1.28   | 1.59 | 1.85 | 1.28 | 1.78  | 1.88 | 1.64 | 1.61 | 1.61 | 1.89 | 1.77 | 1.70 | 1.70 | 1.96 | 1.91 |
| JX-YZ      | 1.72 | 1.50 | 1.93 | 1.73 | 1.56 | 1.07   | 2.04 | 2.02 | 1.60 | 1.78  | 1.81 | 1.75 | 1.50 | 1.83 | 1.70 | 1.70 | 1.70 | 1.70 | 1.98 | 1.87 |
| SC-HJ      | 1.85 | 0.98 | 1.82 | 1.89 | 1.52 | 1.30   | 1.86 | 1.86 | 1.70 | 1.78  | 1.77 | 1.43 | 1.74 | 1.68 | 1.52 | 1.00 | 1.74 | 1.22 | 1.89 | 1.97 |
| SC-KJ      | 1.93 | 1.79 | 1.89 | 1.70 | 1.22 | 1.36   | 1.97 | 1.81 | 0.87 | 1.29  | 1.67 | 1.75 | 1.70 | 1.75 | 1.70 | 1.70 | 1.61 | 1.75 | 1.91 | 1.84 |
| SC-LS      | 1.82 | 1.78 | 1.46 | 1.58 | 1.27 | 1.15   | 1.81 | 1.83 | 1.43 | 1.51  | 1.94 | 1.52 | 1.58 | 1.74 | 1.74 | 1.21 | 1.68 | 1.43 | 1.73 | 1.80 |
| YN-LC      | 1.89 | 1.74 | 1.46 | 1.33 | 1.05 | 0.95   | 1.74 | 1.74 | 0.35 | 0.35  | 1.68 | 1.33 | 0.95 | 1.33 | 0.95 | 1.33 | 1.61 | 1.61 | 1.68 | 1.74 |
| YN-MG      | 2.00 | 1.86 | 1.93 | 1.67 | 1.26 | 1.32   | 1.87 | 1.76 | 1.29 | 1.35  | 1.87 | 1.61 | 1.47 | 1.70 | 1.70 | 1.89 | 1.70 | 1.19 | 1.90 | 1.79 |
| YN-MH      | 1.83 | 1.90 | 1.83 | 1.70 | 1.70 | 1.83   | 1.99 | 1.91 | 1.60 | 1.75  | 1.81 | 1.36 | 1.70 | 1.75 | 1.70 | 1.19 | 1.83 | 1.61 | 1.77 | 1.82 |
| YN-MJ      | 1.64 | 1.49 | 1.82 | 1.64 | 1.70 | 1.70   | 2.02 | 1.97 | 1.40 | 1.64  | 1.87 | 1.42 | 1.50 | 1.70 | 1.70 | 1.56 | 1.83 | 1.70 | 1.93 | 1.99 |
| YN-SM      | 1.45 | 1.42 | 1.84 | 1.55 | 1.28 | 0.80   | 1.71 | 1.62 | 1.49 | 1.45  | 1.99 | 1.75 | 1.75 | 1.48 | 1.55 | 1.28 | 1.48 | 1.48 | 1.43 | 1.81 |
| YN-XC      | 1.71 | 1.87 | 1.96 | 1.28 | 1.15 | 1.28   | 1.94 | 1.87 | 0.44 | 0.44  | 1.96 | 1.75 | 1.48 | 1.75 | 1.28 | 1.15 | 1.75 | 1.35 | 1.73 | 1.76 |
| ZJ-JS      | 1.68 | 1.50 | 1.82 | —    | —    | —      | 1.83 | 1.88 | 1.82 | 1.54  | 1.85 | 1.68 | 1.74 | 1.52 | 1.74 | 1.43 | 1.52 | 1.31 | 1.90 | 1.92 |
| ZJ-LD      | 1.86 | 1.91 | 1.78 | 1.75 | 1.55 | 1.55   | 1.93 | 1.59 | 1.56 | 1.93  | 1.76 | 1.28 | 1.83 | 1.75 | 1.47 | 1.89 | 1.75 | 1.50 | 1.76 | 1.85 |
| ZJ-LY      | 1.39 | 1.63 | 1.81 | 1.33 | 1.01 | 1.33   | 1.75 | 1.67 | 1.68 | 1.74  | 1.77 | 0.96 | 1.15 | 1.08 | 1.55 | 1.35 | 1.48 | 1.15 | 1.79 | 1.69 |
| ZJ-QY      | 1.66 | 1.83 | 1.61 | 1.56 | 1.33 | 1.56   | 1.84 | 1.90 | 1.81 | 1.83  | 1.77 | 1.74 | 1.74 | 1.74 | 1.46 | 1.68 | 1.74 | 1.52 | 1.97 | 1.91 |
| ZJ-SC      | 1.69 | 1.82 | 1.83 | 1.33 | 1.56 | 1.33   | 1.77 | 1.79 | 1.89 | 1.73  | 1.91 | 1.70 | 1.50 | 1.36 | 1.70 | 1.70 | 1.55 | 1.64 | 1.71 | 1.92 |
| mean       | 1.71 | 1.69 | 1.78 | 1.50 | 1.36 | 1.35   | 1.82 | 1.85 | 1.44 | 1.54  | 1.81 | 1.53 | 1.58 | 1.54 | 1.48 | 1.48 | 1.58 | 1.51 | 1.82 | 1.84 |

BD, Basal diameter; CD, Crown diameter; TH, Diameter height; EOC, Essential oil content; EOY, Essential oil yield; EOY/BD, Essential oil yield/ Basal diameter; FPKR, Fresh pulp kernel ratio; FFPR, Fresh fruit pulp rate; FWC, Water content of fruit; FY, fresh fruit yield; FY/BD, Fruit yield/ Basal diameter; TFW, Thousand-grain fresh weight; TDW, Thousand-grain dry weight; LA, Leaf area; LL, Leaf length; LW, Leaf width; LP, Leaf perimeter; PL, Petiole length; LSI, Leaf shape index; LV, Number of leaf veins; Shannon–Wiener index ( $H'$ ) was calculated by the method as described by [Hamil et al. \(2021\)](#).

**Table S5. Nested variance analysis for phenotypic traits of *L. cubeba***

| Traits                       | Mean square        |                   |               | F value            |                   |
|------------------------------|--------------------|-------------------|---------------|--------------------|-------------------|
|                              | Within provenances | Among provenances | Random errors | Within provenances | Among provenances |
| BD (mm)                      | 3511.51            | 11418.89          | 1078.60       | 3.26**             | 10.59**           |
| CD (m <sup>2</sup> )         | 76.43              | 199.82            | 38.26         | 2.00**             | 5.22**            |
| TH (m)                       | 5.87               | 42.01             | 2.44          | 2.41**             | 17.25**           |
| EOC (%)                      | 0.41               | 2.93              | 0.36          | 1.14               | 8.19**            |
| EOY (g)                      | 15542.03           | 29133.90          | 11415.32      | 1.36               | 2.55**            |
| EOY/BD (g.cm <sup>-1</sup> ) | 307.45             | 536.28            | 158.50        | 1.94**             | 3.38**            |
| FPKR                         | 1.17               | 18.37             | 1.01          | 1.16               | 18.24**           |
| FFPR (%)                     | 25.95              | 272.60            | 18.97         | 1.37               | 14.37**           |
| FY (kg)                      | 16.99              | 30.98             | 7.71          | 2.20**             | 4.02**            |
| FY/BD (g.cm <sup>-1</sup> )  | 0.18               | 0.46              | 0.11          | 1.62*              | 4.21**            |
| LA (cm <sup>2</sup> )        | 13.26              | 342.11            | 26.56         | 0.50               | 12.88**           |
| LL (cm)                      | 1.72               | 19.75             | 1.74          | 0.99               | 11.32**           |
| LP (cm)                      | 0.07               | 0.35              | 0.04          | 1.70*              | 9.02**            |
| PL (cm)                      | 15.57              | 367.19            | 9.48          | 1.64*              | 38.72**           |
| LSI                          | 0.37               | 1.09              | 0.22          | 1.66*              | 4.87**            |
| LV                           | 6.94               | 33.93             | 6.33          | 1.10               | 5.36**            |
| LW (cm)                      | 0.15               | 3.31              | 0.25          | 0.60               | 13.31**           |
| TDW (g)                      | 84.51              | 1524.26           | 105.52        | 0.80               | 14.44**           |
| TFW (g)                      | 505.56             | 7232.00           | 599.98        | 0.84               | 12.05**           |
| FWC (%)                      | 35.82              | 1094.44           | 35.60         | 1.01               | 30.74**           |

BD, Basal diameter; CD, Crown diameter; TH, Diameter height; EOC, Essential oil content; EOY, Essential oil yield; EOY/BD, Essential oil yield/ Basal diameter; FPKR, Fresh pulp kernel ratio; FFPR, Fresh fruit pulp rate; FWC, Water content of fruit; FY, fresh fruit yield; FY/BD, Fruit yield/ Basal diameter; TFW, Thousand-grain fresh weight; TDW, Thousand-grain dry weight; LA, Leaf area; LL, Leaf length; LW, Leaf width; LP, Leaf perimeter; PL, Petiole length; LSI, Leaf shape index; LV, Number of leaf veins; Asterisks indicate significance level (\* $P \leq 0.05$ , \*\* $P \leq 0.01$ ).

**Table S6. Multiple comparison on leaf and growth characteristics between provenances of *L. cubeba***

| SN    | BD (mm)          | CD (m <sup>2</sup> ) | TH (m)          | LA (cm <sup>2</sup> ) | LSI               | LL (cm)          | LP (cm)           | LW (cm)         | LV                | PL (cm)         |
|-------|------------------|----------------------|-----------------|-----------------------|-------------------|------------------|-------------------|-----------------|-------------------|-----------------|
| AH-DZ | 46.53±7.64 jkl   | 3.68±0.52 fg         | 4.68±0.36 hijk  | 10.09±0.78 ijkl       | 3.37±0.17 cdefgh  | 7.12±0.37 ijklm  | 18.44±0.71 ijkl   | 2.16±0.12 ghi   | 21±0.19 cdefgh    | 0.91±0.06 ghij  |
| AH-JX | 116.53±11.78 b   | 3.87±0.68 fg         | 2.31±0.08 o     | 11.75±0.60 hijk       | 3.61±0.06 bcde    | 7.87±0.18 ghijk  | 21.30±0.45 efghi  | 2.22±0.06 ghi   | 22±1.03 bcdef     | 1.27±0.05 cde   |
| AH-QM | 42.98±7.82 jkl   | 4.23±0.55 fg         | 5.54±0.27 efgh  | 13.78±0.72 ghij       | 3.79±0.15 bc      | 8.72±0.31 efg    | 22.25±0.68 def    | 2.33±0.09 fghi  | 23.8±0.73 abcd    | 1.01±0.06 fghi  |
| AH-QY | 42.56±6.32 jkl   | 7.71±1.56 bcdef      | 7.11±0.53 bc    | 15.73±0.62 efghi      | 3.42±0.08 bcdefgh | 8.98±0.26 defg   | 23.19±0.46 cdef   | 2.65±0.03 cdefg | 24.00±1.35 abc    | 0.93±0.12 fghij |
| AH-XN | 68.35±9.98 fghi  | 4.62±0.64 fg         | 4.16±0.26 jklm  | 13.27±1.12 ghij       | 3.55±0.06 bcde    | 8.11±0.38 fghij  | 21.30±0.84 efghi  | 2.30±0.10 fghi  | 23.00±0.49 bcd    | 1.09±0.07 efg   |
| FJ-CT | 79.86±9.05 defg  | 5.14±0.83 defg       | 6.02±0.26 cdefg | 11.20±1.9 hijk        | 3.40±0.16 bcdefgh | 7.23±0.57 hijklm | 20.28±1.20 efghij | 2.20±0.22 ghi   | 19.67±0.56 fgh    | 1.10±0.09 efg   |
| FJ-JO | 50.62±4.67 ijk   | 4.18±0.56 fg         | 4.47±0.24 ijkl  | 14.16±1.51 fghij      | 3.44±0.07 bcdef   | 8.45±0.51 efg    | 21.77±1.27 defg   | 2.47±0.14 efg   | 20.89±1.05 defgh  | 0.92±0.06 ghij  |
| FJ-LC | 48.56±3.66 jk    | 4.53±0.58 fg         | 3.91±0.20 jklm  | 7.63±0.72 kl          | 2.85±0.08 ijk     | 5.49±0.35 n      | 16.17±0.96 l      | 1.93±0.11 ij    | 17.00±0.79 i      | 0.78±0.06 jkl   |
| FJ-SX | 54.43±4.69 hij   | 6.5±0.81 def         | 4.16±0.22 jklm  | 13.53±0.70 ghij       | 3.35±0.09 defgh   | 8.04±0.20 ghij   | 21.59±0.75 defgh  | 2.43±0.08 efg   | 21.00±0.42 defgh  | 0.84±0.05 ijk   |
| FJ-ZH | 60.57±8.71 ghij  | 9.76±3.14 abcd       | 7.34±0.48 b     | 13.08±1.06 ghij       | 3.57±0.18 bcde    | 8.12±0.29 fghij  | 21.66±0.84 defgh  | 2.34±0.13 fghi  | 20.30±0.60 efgh   | 0.91±0.05 ghij  |
| GX-GY | 80.45±7.92 def   | 11.51±1.76 ab        | 6.10±0.30 cdefg | 18.70±2.94 def        | 3.38±0.25 bcdefgh | 9.36±0.67 cdef   | 24.44±1.60 cd     | 2.89±0.30 bcde  | 23.29±0.64 bcd    | 1.06±0.07 efg   |
| GZ-BL | 91.64±13.59 cd   | 12.90±2.55 a         | 4.78±0.33 hij   | 5.60±0.31 l           | 3.66±0.17 bcde    | 5.48±0.22 n      | 6.07±0.22 o       | 1.51±0.04 j     | 22.14±0.59 bcdef  | 0.63±0.03 l     |
| GZ-TJ | 89.20±7.02 cde   | 11.57±1.65 ab        | 6.21±0.25 cdef  | 14.26±0.96 fghi       | 3.44±0.12 bcdef   | 8.48±0.27 efg    | 9.47±0.29 no      | 2.50±0.11 efg   | 23.60±0.76 bcd    | 1.05±0.06 fgh   |
| GZ-ZF | 68.64±7.93 fghi  | 7.61±1.81 cdef       | 4.47±0.64 ijk   | 7.67±1.13 jkl         | 3.22±0.17 efghi   | 5.90±0.43 mn     | 6.56±0.47 o       | 1.87±0.16 ij    | 21.00±0.65 defgh  | 0.67±0.05 kl    |
| GZ-ZJ | 64.12±6.57 fghij | 10.51±1.45 abc       | 5.30±0.40 ghi   | 8.85±1.96 jkl         | 3.35±0.19 defgh   | 6.03±0.53 mn     | 6.87±0.62 o       | 1.92±0.25 ij    | 20.20±0.96 fgh    | 0.89±0.10 hij   |
| GZ-ZY | 57.60±6.70 hij   | 5.91±1.48 defg       | 3.5±0.33 mn     | 32.23±3.76 a          | 2.66±0.09 jk      | 11.12±0.59 ab    | 12.34±0.63 m      | 4.25±0.30 a     | 20.00±0.80 fgh    | 1.25±0.08 de    |
| HN-DX | 58.00±4.98 hij   | 4.42±0.49 fg         | 5.28±0.24ghi    | 15.88±1.13 efgh       | 3.54±0.06 bcde    | 9.06±0.35 defg   | 23.34±0.87 cde    | 2.58±0.09 defg  | 22.60±0.65 bcd    | 1.27±0.05 cde   |
| JX-DX | 42.03±10.07 jkl  | 4.16±1.71 fg         | 3.21±0.50 mno   | 17.86±1.70 defg       | 3.53±0.30 bcdef   | 9.85±0.40 bcde   | 10.98±0.41 mn     | 2.84±0.21 bcdef | 21.50±1.32 cdefgh | 1.17±0.01 def   |
| JX-WN | 60.88±5.60 ghij  | 9.19±1.04 bcd        | 4.11±0.26 jklm  | 15.80±1.38 efgh       | 3.02±0.13 fghij   | 8.37±0.35 efg    | 9.29±0.34 no      | 2.79±0.14 cdef  | 23.40±0.95 bcd    | 1.03±0.05 fgh   |
| JX-WY | 51.79±4.39 hijk  | 5.63±0.62 defg       | 4.37±0.24 ijklm | 14.21±1.68 fghij      | 4.04±0.61 ab      | 9.13±0.42 defg   | 10.34±0.48 mno    | 2.36±0.28 fghi  | 24.00±1.15 abcd   | 1.33±0.11 bcde  |
| JX-WZ | 32.53±1.99 kl    | 5.51±0.68 defg       | 3.78±0.32 klmn  | 17.24±1.47 efg        | 3.36±0.26 cdefgh  | 9.27±0.35 def    | 10.24±0.35 mno    | 2.77±0.18 cdef  | 24.00±1.33 abcd   | 1.09±0.06 efg   |
| JX-YZ | 27.19±2.32 l     | 3.33±0.67 fg         | 2.86±0.15 no    | 17.53±1.56 defg       | 2.90±0.11 hijk    | 8.56±0.42 efg    | 9.46±0.46 no      | 2.98±0.17 bcd   | 19.40±0.75 gh     | 1.04±0.07 fgh   |
| SC-HJ | 80.73±3.36 def   | 10.93±2.94 abc       | 6.58±0.32 bcd   | 31.65±4.11 a          | 2.94±0.13 ghijk   | 11.54±0.74 a     | 30.64±1.95 a      | 4.03±0.31 a     | 23.22±0.92 bcd    | 1.46±0.06 ab    |
| SC-KJ | 51.43±3.78 ijk   | 10.92±1.30 abc       | 3.54±0.16 lmn   | 24.95±1.63 bc         | 3.35±0.09 defgh   | 11.07±0.42 ab    | 27.85±1.00 ab     | 3.33±0.10 b     | 23.30±0.78 bcd    | 1.14±0.07 ef    |
| SC-LS | 56.33±4.39 hij   | 8.48±0.99 bcde       | 5.31±0.36 fghi  | 25.59±2.93 b          | 2.55±0.14 k       | 9.61±0.48 cde    | 25.25±1.31 bc     | 3.89±0.30 a     | 21.67±0.99 cdefg  | 1.37±0.12 bcd   |
| YN-LC | 66.61±3.84 fghij | 10.15±1.09 abcd      | 6.82±0.54 bcd   | 22.82±2.73 bcd        | 3.43±0.24 bcdefg  | 10.79±1.03 abc   | 28.79±2.15 a      | 3.16±0.15 bc    | 26.40±2.29 a      | 1.60±0.19 a     |
| YN-MG | 63.38±5.27 fghij | 9.85±1.09 abcd       | 6.73±0.42 bcd   | 9.32±1.92 jkl         | 3.37±0.10 cdefgh  | 6.57±0.58 lmn    | 18.19±1.31 jkl    | 1.97±0.18 hij   | 18.80±0.66 hi     | 0.88±0.07 hij   |
| YN-MH | 71.60±5.20 efgh  | 9.50±0.82 abcd       | 5.9±0.50 defg   | 10.82±0.66 ijk        | 3.49±0.06 bcdef   | 7.41±0.25 hijkl  | 19.99±0.62 fghij  | 2.14±0.07 ghi   | 22.50±0.81 bcde   | 1.01±0.05 fghi  |
| YN-MJ | 105.44±9.10 bc   | 6.73±1.13 def        | 7.06±0.34 bc    | 13.79±1.69 ghij       | 3.36±0.22 cdefgh  | 7.72±0.59 ghijkl | 21.18±1.46 efghi  | 2.37±0.17 fgh   | 22.20±0.47 bcdef  | 1.04±0.05 fgh   |
| YN-SM | 147.51±22.08 a   | 11.75±1.77 ab        | 8.70±0.83 a     | 15.31±2.33 efghi      | 3.18±0.12 efghi   | 8.15±0.76 fghij  | 22.98±2.08 cdef   | 2.56±0.19 defg  | 24.43±0.53 ab     | 1.36±0.09 bcd   |
| YN-XC | 70.30±5.45 efghi | 9.32±1.13 abcd       | 5.98±0.37 cdefg | 20.14±1.61 cde        | 3.66±0.16 bcde    | 10.34±0.36 abcd  | 28.68±1.06 a      | 2.87±0.17 bcde  | 26.14±0.99 a      | 1.45±0.10 abc   |
| ZJ-JS | 30.89±3.69 kl    | 4.85±1.25 efg        | 4.6±0.38 hijk   | 14.12±1.50 fghij      | 3.44±0.23 bcdef   | 8.32±0.33 efghi  | 16.35±2.16 kl     | 2.51±0.19 efg   | 21.89±1.01 cdef   | 1.14±0.04 ef    |
| ZJ-LD | 61.89±6.45 fghij | 12.80±1.74 a         | 6.57±0.41 bcd   | 9.51±0.60 jkl         | 3.28±0.11 efgh    | 6.84±0.32 klm    | 18.89±0.82 hijkl  | 2.11±0.06 ghi   | 19.20±0.61 hi     | 0.89±0.05 hij   |
| ZJ-LY | 56.88±9.44 hij   | 7.20±1.69 cdef       | 6.49±0.38 bcde  | 9.64±1.38 ijkl        | 3.76±0.15 bcd     | 7.34±0.54 hijkl  | 20.13±1.46 fghij  | 1.96±0.14 hij   | 24.00±1.00 abcd   | 1.07±0.07 efgh  |
| ZJ-QY | 46.27±2.97 jkl   | 5.35±0.41 defg       | 5.85±0.30 defg  | 10.13±0.85 ijkl       | 4.44±0.42 a       | 8.19±0.54 fghi   | 21.73±1.47 defgh  | 1.91±0.12 ij    | 23.67±1.13 abcd   | 1.12±0.05 ef    |
| ZJ-SC | 53.12±7.38 hij   | 2.68±0.41 g          | 3.32±0.23 mn    | 8.52±0.68 jkl         | 3.77±0.14 bcd     | 6.98±0.33 jklm   | 18.96±0.83 ghijk  | 1.88±0.08 ij    | 21.20±0.76 cdefgh | 1.07±0.06 efg   |

BD, Basal diameter; CD, Crown diameter; TH, Diameter height; LA, Leaf area; LL, Leaf length; LW, Leaf width; LP, Leaf perimeter; PL, Petiole length; LSI, Leaf shape index; LV, Number of leaf veins;

**Table S7. Multiple comparison on fruit characteristics between provenances of *L. cubeba***

| SN    | TFW (g)           | TDW (g)            | FWC (%)            | FFPR (%)         | FPKR             | FY (kg)         | FY/BD (g.cm <sup>-1</sup> ) | EOC (%)         | EOY (g)          | EOY/BD (g. cm <sup>-1</sup> ) |
|-------|-------------------|--------------------|--------------------|------------------|------------------|-----------------|-----------------------------|-----------------|------------------|-------------------------------|
| AH-DZ | 126.11±6.16 ghijk | 55.16±2.54 cdefg   | 55.53±2.10 mno     | 76.33±0.87 hij   | 3.32±0.16 hijk   | 0.58±0.11 efg   | 0.17±0.04 def               | 2.85±0.25 defgh | 27.48±4.84 d     | 6.81±2.06 cdef                |
| AH-JX | 140.19±8.21 efg   | 66.47±3.75 a       | 51.59±2.00 p       | 71.95±1.57 lm    | 2.83±0.21 klm    | 0.38±0.06 efg   | 0.04±0.01 f                 | 3.49±0.25 bc    | 22.03±2.14 d     | 1.68±0.31 f                   |
| AH-QM | 123.58±5.36 ijk   | 50.74±1.98 efghij  | 58.45±1.23 klmn    | 79.01±0.85 efgh  | 3.95±0.23 efgh   | 0.43±0.06 efg   | 0.17±0.03 def               | 3.51±0.14 bc    | 19.33±2.70 d     | 5.10±1.13 ef                  |
| AH-QY | 127.17±5.29 ghijk | 51.91±2.12 defghij | 58.84±1.62 jklmn   | 79.34±1.34 defgh | 4.07±0.40 efgh   | 0.21±0.06 fg    | 0.05±0.01 f                 | 3.58±0.27 abc   | 14.71±4.33 d     | 2.84±1.13 f                   |
| AH-XN | 115.94±4.03 klm   | 47.16±1.72 ijkl    | 58.9±1.32 jklm     | 79.28±0.96 efgh  | 4.16±0.32 defg   | 0.41±0.10 efg   | 0.05±0.01 f                 | 3.83±0.45 ab    | 53.92±9.02 cd    | 4.62±1.14 ef                  |
| FJ-CT | 105.88±3.32 lmn   | 39.67±1.52 no      | 62.37±1.27 fghij   | 78.97±0.99 efgh  | 3.91±0.21 efgh   | 0.83±0.14 defg  | 0.10±0.01 ef                | 3.75±0.50 abc   | 42.61±14.87 cd   | 4.23±1.28 ef                  |
| FJ-JO | 122.05±4.68 jkl   | 41.57±1.33 lmno    | 65.52±0.97 def     | 80.02±1.16 defg  | 4.27±0.25 cde    | 0.48±0.08 efg   | 0.09±0.01 ef                | 3.79±0.15 ab    | 35.71±5.43 d     | 4.49±0.44 ef                  |
| FJ-LC | 99.18±3.00 n      | 44.54±1.80 jklmn   | 55.07±1.20 no      | 75.66±0.87 ij    | 3.24±0.16 ijk    | 0.40±0.08 efg   | 0.08±0.01 f                 | 3.89±0.10 ab    | 51.89±7.29 cd    | 7.97±1.53 cdef                |
| FJ-SX | 125.48±3.22 hijk  | 49.52±1.78 ghij    | 60.32±1.34 hijklm  | 79.02±0.76 efgh  | 3.92±0.18 efgh   | 0.50±0.09 efg   | 0.09±0.02 ef                | 2.84±0.21 efgh  | 20.27±4.68 d     | 3.47±0.82 f                   |
| FJ-ZH | 128.04±5.16 ghijk | 49.31±2.27 ghijk   | 61.2±1.55 ghijkl   | 77.99±1.24 fghi  | 3.82±0.32 efghi  | 0.72±0.33 efg   | 0.10±0.03 ef                | —               | —                | —                             |
| GX-GY | 136.89±4.85 efghi | 56.75±2.03 cde     | 58.17±1.29 lmn     | 77.73±0.88 ghi   | 3.63±0.17 ghij   | 1.85±0.44 cdef  | 0.23±0.04 def               | 3.29±0.18 bcde  | 114.63±30.82 bcd | 13.16±3.28 cdef               |
| GZ-BL | 178.86±7.14 a     | 64.58±1.86 ab      | 63.40±0.83 efgh    | 79.56±0.54 defg  | 3.97±0.14 efgh   | 0.9±0.30 defg   | 0.08±0.02 ef                | 2.79±0.14 efgh  | 55.51±21.08 cd   | 3.82±1.20 ef                  |
| GZ-TJ | 116.45±4.57 klm   | 50.45±2.01 fghij   | 56.42±0.90 lmn     | 75.28±0.64 ijk   | 3.11±0.11 jkl    | 2.59±0.55 bcde  | 0.27±0.05 cde               | 3.27±0.23 bcde  | 105.43±22.22 bcd | 9.66±1.93 cdef                |
| GZ-ZF | 146.76±4.92 def   | 52.61±2.34 defghi  | 63.87±1.54 efg     | 80.31±0.76 def   | 4.23±0.19 def    | 3.05±0.95 abc   | 0.36±0.07 cd                | 2.73±0.11 efghi | 118.48±65.41 bcd | 12.47±3.82 cdef               |
| GZ-ZJ | 145.4±5.54 def    | 49.76±1.46 fghij   | 65.32±0.80 ef      | 80.04±0.64 defg  | 4.14±0.17 efg    | 1.40±0.37 defg  | 0.21±0.04 def               | 2.63±0.25 fghi  | 52.57±26.43 cd   | 6.93±2.26 cdef                |
| GZ-ZY | 153.18±4.29 cde   | 57.80±1.58 cd      | 62.07±0.72 fghij   | 77.74±0.84 ghi   | 3.64±0.17 ghij   | 4.31±1.20 a     | 0.57±0.14 ab                | 2.44±0.17 ghij  | 135.51±42.94 bcd | 17.28±5.42 cd                 |
| HN-DX | 120.36±5.02 jkl   | 56.70±2.96 cde     | 52.90±1.50 op      | 74.62±0.94 jk    | 3.10±0.19 jkl    | 0.69±0.07 efg   | 0.13±0.01 ef                | 4.22±0.21 a     | 38.24±4.18 d     | 6.17±1.00 def                 |
| JX-DX | 108.62±7.50 klmn  | 43.06±3.39 klmnno  | 60.49±0.62 ghijklm | 78.82±1.13 efghi | 3.79±0.26 efghij | 2.88±0.84 abcde | 0.74±0.31 a                 | 3.41±0.11 bcde  | 137.70±19.76 bcd | 34.67±15.00 ab                |
| JX-WN | 121.74±6.03 jkl   | 48.1±1.85 hijk     | 59.56±1.32 ijklm   | 76.22±0.90 hij   | 3.36±0.18 hijk   | 2.88±0.61 abcde | 0.43±0.06 bc                | 3.29±0.21 bcde  | 122.64±37.95 bcd | 16.58±2.91 cde                |
| JX-WY | 122.3±4.35 ijkl   | 42.8±1.94 klmnno   | 64.87±1.24 efg     | 81.89±1.09 cde   | 4.80±0.37 cd     | 0.52±0.17 efg   | 0.11±0.03 ef                | 2.55±0.05 fghij | 30.76±17.56 d    | 5.56±2.43 def                 |
| JX-WZ | 121.57±5.44 jkl   | 37.61±2.08 o       | 69.05±1.00 bcd     | 82.10±0.86 cd    | 4.89±0.38 c      | 0.64±0.17 efg   | 0.19±0.04 def               | 3.00±0.31 cdefg | 21.76±5.13 d     | 6.72±1.32 cdef                |
| JX-YZ | 123.56±3.53 ijk   | 45.97±1.46 jklm    | 62.69±0.86 fghi    | 78.33±0.51 fghi  | 3.68±0.11 fghij  | 0.47±0.09 efg   | 0.16±0.02 ef                | 3.42±0.27 bcd   | 24.70±4.37 d     | 8.80±1.21 cdef                |
| SC-HJ | 140.93±3.77 efg   | 53.5±1.24 defgh    | 61.82±0.70 ghijk   | 78.23±0.77 fghi  | 3.73±0.18 efghij | 1.08±0.14 defg  | 0.13±0.02 ef                | 3.26±0.13 bcde  | 55.09±10.03 cd   | 6.14±1.06 def                 |
| SC-KJ | 125.50±6.79 hijk  | 70.26±2.64 a       | 42.03±2.25 r       | 70.46±1.29 m     | 2.52±0.14 m      | 2.86±1.01 abcde | 0.45±0.13 abc               | 4.17±0.24 a     | 269.09±103.14 a  | 39.76±12.92 a                 |
| SC-LS | 139.17±5.69 efgh  | 52.81±2.14 defghi  | 61.44±1.39 ghijkl  | 77.58±0.92 ghi   | 3.64±0.20 fghij  | 0.87±0.20 defg  | 0.14±0.02 ef                | 2.78±0.20 efgh  | 39.86±13.49 d    | 5.60±1.72 def                 |
| YN-LC | 155.33±7.38 bcde  | 38.13±4.17 o       | 75.84±1.89 a       | 87.49±0.77 a     | 7.22±0.45 a      | 3.04±2.33 abcd  | 0.49±0.37 abc               | 2.44±0.34 ghij  | 127.8±105.33 bcd | 20.72±16.61 bc                |
| YN-MG | 116.27±3.93 klm   | 38.34±1.48 o       | 66.74±1.16 cde     | 84.09±0.82 bc    | 5.58±0.28 b      | 1.89±0.62 cde   | 0.27±0.08 cde               | 1.90±0.27 jk    | 76.66±35.69 cd   | 9.85±4.00 cdef                |
| YN-MH | 140.33±5.39 efg   | 41.17±2.45 mno     | 70.90±0.97 b       | 84.68±0.65 abc   | 5.78±0.26 b      | 1.48±0.29 cdefg | 0.20±0.03 def               | 1.75±0.10 k     | 48.35±10.60 cd   | 5.80±1.23 def                 |
| YN-MJ | 171.28±4.81 ab    | 43.51±1.35 klmnno  | 74.58±0.37 a       | 76.37±0.90 hij   | 3.39±0.17 hijk   | 2.61±0.38 bcde  | 0.25±0.03 cdef              | 2.86±0.11 defg  | 125.74±17.01 bcd | 9.92±0.88 cdef                |
| YN-SM | 160.26±4.43 bcd   | 43.29±2.77 klmnno  | 73.05±1.34 ab      | 86.03±1.23 ab    | 6.79±0.55 a      | 4.43±1.58 a     | 0.25±0.09 cdef              | 2.24±0.11 hijk  | 193.91±62.51 ab  | 10.49±4.04 cdef               |
| YN-XC | 165.66±6.92 abc   | 49.89±2.36 fghij   | 69.79±0.87 bc      | 77.93±1.08 fghi  | 3.7±0.22 efghij  | 3.73±2.59 ab    | 0.48±0.31 abc               | 2.11±0.14 ijk   | 153.57±103.61 bc | 19.70±12.47 bc                |
| ZJ-JS | 104.77±3.68 mn    | 45.41±1.97 jklmn   | 56.35±1.73 mno     | 77.65±0.95 ghi   | 3.64±0.21 ghij   | 0.11±0.01 g     | 0.05±0.01 f                 | —               | —                | —                             |
| ZJ-LD | 112.79±7.68 klmn  | 54.25±3.41 defg    | 51.52±0.67 p       | 72.99±1.39 kl    | 2.86±0.15 klm    | 0.54±0.08 efg   | 0.09±0.01 ef                | 3.51±0.28 bc    | 35.84±3.94 d     | 4.58±0.81 ef                  |
| ZJ-LY | 134.51±5.48 fghij | 70.84±2.52 a       | 47.00±1.06 q       | 71.71±0.62 lm    | 2.56±0.08 lm     | 0.64±0.13 efg   | 0.12±0.02 ef                | 3.65±0.28 abc   | 9.48±2.21 d      | 2.38±0.57 f                   |
| ZJ-QY | 124.50±3.97 ijk   | 55.57±1.86 cdef    | 55.28±0.75 mno     | 75.21±0.64 ijk   | 3.10±0.12 jklm   | 0.40±0.05 efg   | 0.09±0.01 ef                | 3.13±0.21 bcdef | 21.24±1.40 d     | 4.19±0.54 ef                  |
| ZJ-SC | 133.94±4.06 fghij | 60.35±2.54 bc      | 54.96±1.46 no      | 74.70±0.97 jk    | 3.11±0.18 jkl    | 0.27±0.04 fg    | 0.06±0.01 f                 | 3.38±0.18 bcde  | 18.05±2.84 d     | 3.60±1.23 ef                  |

EOC, Essential oil content; EOY, Essential oil yield; EOY/BD, Essential oil yield/ Basal diameter; FPKR, Fresh pulp kernel ratio; FFPR, Fresh fruit pulp rate; FWC, Water content of fruit; FY, fresh fruit yield; FY/BD, Fruit yield/ Basal diameter; TFW, Thousand-grain fresh weight; TDW, Thousand-grain dry weight;



**Table S8. The result of path analysis for LA of *L. cubeba***

| Factors | Path coefficient (LA - response factors) |                           |        |         |        |        |        |        |         |        |        |        |
|---------|------------------------------------------|---------------------------|--------|---------|--------|--------|--------|--------|---------|--------|--------|--------|
|         | Direct path coefficient                  | Indirect path coefficient |        |         |        |        |        |        |         |        |        |        |
|         |                                          | STPC                      | SBD    | SMaxWHC | STOC   | STNC   | Longi  | AARH   | SMinWHC | AAMinT | AAR    | STKC   |
| STPC    | -0.374                                   |                           | -0.055 | -0.023  | -0.012 | -0.001 | 0.084  | -0.007 | -0.024  | -0.022 | 0.008  | -0.023 |
| SBD     | 0.214                                    | 0.096                     |        | 0.031   | 0.010  | 0.001  | 0.101  | 0.022  | 0.032   | 0.038  | 0.009  | -0.007 |
| SMaxWHC | -0.046                                   | -0.187                    | -0.144 |         | -0.013 | -0.001 | 0.055  | 0.011  | -0.059  | -0.039 | 0.009  | -0.009 |
| STOC    | -0.020                                   | -0.226                    | -0.106 | -0.029  |        | -0.002 | 0.079  | -0.006 | -0.031  | -0.023 | 0.008  | -0.018 |
| STNC    | -0.002                                   | -0.185                    | -0.110 | -0.023  | -0.017 |        | 0.029  | -0.020 | -0.022  | -0.026 | 0.006  | 0.010  |
| Longi   | -0.268                                   | 0.118                     | -0.080 | 0.009   | 0.006  | 0.000  |        | -0.025 | 0.021   | 0.010  | -0.038 | 0.018  |
| AARH    | 0.086                                    | 0.029                     | 0.055  | -0.006  | 0.001  | 0.000  | 0.078  |        | -0.014  | -0.023 | 0.011  | -0.027 |
| SMinWHC | -0.066                                   | -0.137                    | -0.105 | -0.041  | -0.009 | -0.001 | 0.085  | 0.019  |         | -0.036 | 0.013  | -0.017 |
| AAMinT  | 0.108                                    | 0.078                     | 0.075  | 0.017   | 0.004  | 0.000  | -0.025 | -0.019 | 0.022   |        | -0.010 | -0.011 |
| AAR     | -0.054                                   | 0.058                     | -0.037 | 0.008   | 0.003  | 0.000  | -0.191 | -0.017 | 0.016   | 0.020  |        | 0.001  |
| STKC    | 0.149                                    | 0.058                     | -0.010 | 0.003   | 0.002  | 0.000  | -0.032 | -0.015 | 0.008   | -0.008 | 0.000  |        |

Longi, Longitude; AAMinT, annual average minimum temperature; AARH, annual average relative humidity; AAR, annual average rainfall; SBD, Soil bulk density; SMaxWHC, Soil Maximum water holding capacity; SMinWHC, Soil Minimum water holding capacity; STOC, Soil total carbon content; STNC, Soil total nitrogen content; STPC, Soil total phosphorus content; STKC, Soil total potassium content.

**Table S9. The result of path analysis for LSI of *L. cubeba***

| Factors | Path coefficient (LSI - response factors) |                           |        |        |        |        |        |        |        |         |        |
|---------|-------------------------------------------|---------------------------|--------|--------|--------|--------|--------|--------|--------|---------|--------|
|         | Direct path coefficient                   | Indirect path coefficient |        |        |        |        |        |        |        |         |        |
|         |                                           | SBD                       | STPC   | SpH    | STNC   | STOC   | AARH   | AAR    | Longi  | SMaxWHC | SP     |
| SBD     | -0.261                                    |                           | -0.049 | 0.009  | -0.031 | -0.001 | -0.012 | -0.037 | -0.026 | -0.011  | -0.004 |
| STPC    | 0.190                                     | 0.067                     |        | 0.061  | 0.030  | 0.001  | 0.004  | -0.033 | -0.022 | 0.008   | -0.009 |
| SpH     | 0.259                                     | -0.009                    | 0.045  |        | 0.008  | 0.000  | 0.011  | -0.015 | -0.001 | -0.003  | 0.007  |
| STNC    | 0.061                                     | 0.134                     | 0.094  | 0.033  |        | 0.002  | 0.011  | -0.025 | -0.007 | 0.008   | -0.003 |
| STOC    | 0.002                                     | 0.129                     | 0.115  | 0.020  | 0.052  |        | 0.003  | -0.032 | -0.020 | 0.010   | -0.009 |
| AARH    | -0.047                                    | -0.067                    | -0.015 | -0.062 | -0.015 | 0.000  |        | -0.043 | -0.020 | 0.002   | -0.015 |
| AAR     | 0.214                                     | 0.045                     | -0.030 | -0.018 | -0.007 | 0.000  | 0.009  |        | 0.049  | -0.003  | 0.011  |
| Longi   | 0.069                                     | 0.098                     | -0.060 | -0.005 | -0.007 | -0.001 | 0.014  | 0.152  |        | -0.003  | 0.021  |
| SMaxWHC | 0.016                                     | 0.175                     | 0.095  | -0.042 | 0.030  | 0.001  | -0.006 | -0.036 | -0.014 |         | -0.019 |
| SP      | -0.031                                    | -0.031                    | 0.057  | -0.060 | 0.006  | 0.001  | -0.023 | -0.077 | -0.046 | 0.010   |        |

Longi, Longitude; AARH, annual average relative humidity; AAR, annual average rainfall; SBD, Soil bulk density; SpH, Soil pH; SMaxWHC, Soil Maximum water holding capacity; STOC, Soil total carbon content; STNC, Soil total nitrogen content; STPC, Soil total phosphorus content;

**Table S10. The result of path analysis for TFW of *L. cubeba***

| Factors | Path coefficient (TFW - response factors) |                           |        |        |        |        |        |        |        |        |        |        |        |         |        |        |        |        |
|---------|-------------------------------------------|---------------------------|--------|--------|--------|--------|--------|--------|--------|--------|--------|--------|--------|---------|--------|--------|--------|--------|
|         | Direct path coefficient                   | Indirect path coefficient |        |        |        |        |        |        |        |        |        |        |        |         |        |        |        |        |
|         |                                           | AAR                       | Longi  | Ele    | AAMinT | BD     | AAT    | SWC    | PL     | AAMaxT | Lati   | LA     | LV     | SMinWHC | SP     | CD     | LP     | LL     |
| AAR     | 0.069                                     |                           | 0.029  | -0.292 | -0.058 | -0.016 | 0.010  | 0.018  | -0.001 | 0.010  | 0.006  | -0.021 | -0.001 | 0.035   | 0.001  | -0.007 | -0.034 | -0.004 |
| Longi   | 0.041                                     | 0.049                     |        | -0.368 | -0.030 | -0.021 | 0.004  | 0.026  | -0.012 | 0.002  | 0.016  | -0.023 | 0.001  | 0.046   | 0.001  | -0.008 | -0.017 | -0.013 |
| Ele     | 0.477                                     | -0.042                    | -0.032 |        | 0.091  | 0.024  | -0.008 | -0.036 | -0.001 | -0.004 | -0.016 | -0.011 | 0.000  | -0.091  | -0.001 | 0.006  | -0.016 | -0.030 |
| AAMinT  | -0.322                                    | 0.012                     | 0.004  | -0.135 |        | -0.022 | 0.026  | 0.019  | 0.011  | 0.017  | -0.004 | 0.022  | 0.000  | 0.049   | 0.000  | -0.002 | 0.093  | 0.037  |
| BD      | 0.093                                     | -0.012                    | -0.009 | 0.124  | 0.075  |        | -0.005 | -0.001 | 0.005  | -0.002 | -0.005 | -0.012 | 0.000  | -0.005  | 0.000  | 0.012  | 0.017  | -0.022 |
| AAT     | 0.028                                     | 0.025                     | 0.006  | -0.128 | -0.299 | -0.017 |        | 0.021  | 0.012  | 0.022  | -0.006 | 0.012  | -0.001 | 0.047   | 0.000  | -0.004 | 0.092  | 0.031  |
| SWC     | -0.053                                    | -0.024                    | -0.020 | 0.326  | 0.114  | 0.002  | -0.011 |        | -0.006 | -0.007 | -0.011 | -0.014 | 0.000  | -0.114  | -0.001 | 0.006  | -0.068 | -0.035 |
| PL      | 0.068                                     | -0.001                    | -0.007 | -0.004 | -0.051 | 0.007  | 0.005  | 0.005  |        | 0.004  | 0.000  | 0.067  | -0.004 | 0.012   | 0.000  | -0.001 | 0.107  | 0.099  |
| AAMaxT  | 0.023                                     | 0.030                     | 0.004  | -0.074 | -0.243 | -0.008 | 0.026  | 0.017  | 0.012  |        | -0.009 | 0.000  | -0.001 | 0.030   | 0.000  | -0.004 | 0.080  | 0.020  |
| Lati    | 0.023                                     | 0.017                     | 0.028  | -0.329 | 0.060  | -0.021 | -0.007 | 0.025  | 0.000  | -0.009 |        | 0.013  | 0.000  | 0.059   | 0.001  | -0.006 | 0.002  | 0.024  |
| LA      | 0.110                                     | -0.013                    | -0.009 | -0.048 | -0.066 | -0.010 | 0.003  | 0.007  | 0.042  | 0.000  | 0.003  |        | -0.003 | 0.030   | 0.000  | 0.000  | 0.099  | 0.136  |
| LV      | -0.011                                    | 0.004                     | -0.004 | 0.013  | -0.002 | -0.003 | 0.002  | 0.002  | 0.025  | 0.002  | 0.000  | 0.035  |        | 0.012   | 0.000  | -0.001 | 0.081  | 0.069  |
| SMinWHC | -0.146                                    | -0.017                    | -0.013 | 0.296  | 0.107  | 0.003  | -0.009 | -0.041 | -0.005 | -0.005 | -0.009 | -0.023 | 0.001  |         | -0.001 | 0.004  | -0.052 | -0.041 |
| SP      | -0.002                                    | -0.025                    | -0.027 | 0.275  | 0.023  | 0.007  | -0.003 | -0.038 | 0.003  | -0.001 | -0.015 | 0.005  | 0.000  | -0.098  |        | 0.006  | -0.036 | -0.011 |
| CD      | 0.025                                     | -0.020                    | -0.013 | 0.120  | 0.028  | 0.044  | -0.004 | -0.012 | -0.003 | -0.003 | -0.005 | 0.001  | 0.000  | -0.022  | 0.000  |        | 0.001  | -0.006 |
| LP      | 0.202                                     | -0.012                    | -0.003 | -0.037 | -0.147 | 0.008  | 0.013  | 0.018  | 0.036  | 0.009  | 0.000  | 0.054  | -0.004 | 0.037   | 0.000  | 0.000  |        | 0.091  |
| LL      | 0.150                                     | -0.002                    | -0.003 | -0.097 | -0.079 | -0.013 | 0.006  | 0.012  | 0.045  | 0.003  | 0.004  | 0.100  | -0.005 | 0.040   | 0.000  | -0.001 | 0.122  |        |

Longi, Longitude; Lati, Latitude; Ele, Elevation; AAT, Annual average temperature; AAMaxT, Annual average maximum temperature; AAMinT, annual average minimum temperature; AAR, annual average rainfall; SWC, Soil Water content; SP, Soil porosity; SMinWHC, Soil Minimum water holding capacity; BD, Basal diameter; CD, Crown diameter; LA, Leaf area; LL, Leaf length; LP, Leaf perimeter; PL, Petiole length; LV, Number of leaf veins.

**Table S11. The result of path analysis for FFPR of *L. cubeba***

| Factors | Path coefficient (FFPR - response factors) |                           |        |        |        |        |        |        |        |        |         |         |        |        |        |        |
|---------|--------------------------------------------|---------------------------|--------|--------|--------|--------|--------|--------|--------|--------|---------|---------|--------|--------|--------|--------|
|         | Direct path coefficient                    | Indirect path coefficient |        |        |        |        |        |        |        |        |         |         |        |        |        |        |
|         |                                            | Lati                      | Longi  | Ele    | SP     | SWC    | TH     | AAR    | STOC   | AARH   | SMinWHC | SMaxWHC | STNC   | STPC   | SpH    | CD     |
| Lati    | -0.162                                     |                           | 0.179  | 0.140  | 0.060  | -0.036 | 0.018  | 0.011  | 0.037  | -0.004 | -0.004  | -0.040  | 0.040  | 0.007  | -0.021 | 0.006  |
| Longi   | -0.478                                     | 0.061                     |        | -0.241 | -0.169 | 0.058  | -0.033 | -0.020 | -0.044 | 0.007  | 0.000   | 0.083   | -0.089 | -0.010 | 0.040  | -0.002 |
| Ele     | -0.357                                     | 0.063                     | -0.323 |        | -0.189 | 0.059  | -0.034 | -0.019 | -0.125 | 0.005  | 0.006   | 0.065   | -0.052 | -0.004 | 0.038  | 0.001  |
| SP      | 0.245                                      | -0.039                    | 0.329  | 0.276  |        | -0.051 | 0.047  | 0.017  | 0.108  | -0.009 | -0.001  | -0.126  | 0.138  | 0.015  | -0.058 | -0.001 |
| SWC     | -0.089                                     | -0.066                    | 0.310  | 0.238  | 0.141  |        | 0.049  | 0.011  | 0.063  | -0.005 | -0.009  | -0.137  | 0.156  | 0.004  | -0.037 | 0.009  |
| TH      | 0.069                                      | -0.042                    | 0.226  | 0.174  | 0.168  | -0.063 |        | 0.012  | 0.061  | -0.009 | -0.004  | -0.159  | 0.210  | 0.013  | -0.051 | 0.012  |
| AAR     | 0.048                                      | -0.039                    | 0.203  | 0.142  | 0.085  | -0.020 | 0.018  |        | 0.062  | -0.005 | 0.000   | -0.030  | 0.051  | 0.010  | -0.031 | -0.002 |
| STOC    | -0.176                                     | 0.034                     | -0.120 | -0.254 | -0.150 | 0.032  | -0.024 | -0.017 |        | 0.003  | 0.004   | 0.049   | -0.043 | -0.004 | 0.019  | 0.003  |
| AARH    | -0.017                                     | -0.034                    | 0.209  | 0.105  | 0.124  | -0.027 | 0.036  | 0.014  | 0.026  |        | 0.001   | -0.096  | 0.162  | 0.034  | -0.074 | -0.003 |
| SMinWHC | -0.019                                     | -0.032                    | -0.011 | 0.104  | 0.012  | -0.043 | 0.014  | -0.001 | 0.035  | 0.001  |         | -0.044  | 0.032  | -0.009 | 0.010  | 0.009  |
| SMaxWHC | -0.204                                     | -0.031                    | 0.194  | 0.113  | 0.152  | -0.060 | 0.054  | 0.007  | 0.043  | -0.008 | -0.004  |         | 0.229  | 0.013  | -0.045 | 0.006  |
| STNC    | 0.254                                      | -0.026                    | 0.167  | 0.073  | 0.133  | -0.055 | 0.057  | 0.010  | 0.030  | -0.011 | -0.002  | -0.184  |        | 0.019  | -0.061 | 0.006  |
| STPC    | 0.039                                      | -0.029                    | 0.122  | 0.039  | 0.091  | -0.009 | 0.022  | 0.013  | 0.020  | -0.015 | 0.005   | -0.067  | 0.126  |        | -0.060 | -0.005 |
| SpH     | -0.122                                     | -0.029                    | 0.156  | 0.112  | 0.116  | -0.027 | 0.029  | 0.012  | 0.027  | -0.010 | 0.001   | -0.075  | 0.127  | 0.019  |        | -0.009 |
| CD      | -0.038                                     | 0.024                     | -0.028 | 0.007  | 0.010  | 0.021  | -0.022 | 0.002  | 0.012  | -0.001 | 0.005   | 0.033   | -0.041 | 0.005  | -0.029 |        |

Longi, Longitude; Lati, Latitude; Ele, Elevation; AARH, annual average relative humidity; AAR, annual average rainfall; SWC, Soil Water content; SP, Soil porosity; SMinWHC, Soil Minimum water holding capacity; SMaxWHC, Soil Maximum water holding capacity; STNC, Soil total nitrogen content; STPC, Soil total phosphorus content; SpH, Soil PH; STOC, Soil total carbon content; CD, Crown diameter; TH, Diameter height; LL, Leaf length.

**Table S12. The result of path analysis for FY of *L. cubeba***

| Factors | Path coefficient (FY - response factors) |                           |        |        |        |        |        |        |        |        |        |        |        |
|---------|------------------------------------------|---------------------------|--------|--------|--------|--------|--------|--------|--------|--------|--------|--------|--------|
|         | Direct path coefficient                  | Indirect path coefficient |        |        |        |        |        |        |        |        |        |        |        |
|         |                                          | Longi                     | Lati   | Ele    | CD     | BD     | TH     | SP     | SBD    | AAR    | FWC    | STKC   | LL     |
| Longi   | -0.403                                   |                           | 0.003  | 0.042  | -0.053 | -0.051 | 0.001  | 0.021  | -0.030 | 0.146  | 0.032  | 0.032  | -0.008 |
| Lati    | 0.005                                    | -0.272                    |        | 0.038  | -0.038 | -0.052 | 0.001  | 0.021  | -0.008 | 0.051  | 0.034  | 0.057  | 0.014  |
| Ele     | -0.055                                   | 0.311                     | -0.003 |        | 0.042  | 0.060  | -0.001 | -0.018 | -0.006 | -0.126 | -0.027 | -0.040 | -0.018 |
| CD      | 0.166                                    | 0.128                     | -0.001 | -0.014 |        | 0.107  | -0.002 | -0.008 | 0.002  | -0.060 | -0.009 | -0.006 | -0.003 |
| BD      | 0.229                                    | 0.090                     | -0.001 | -0.014 | 0.078  |        | -0.001 | -0.002 | -0.001 | -0.036 | -0.008 | -0.075 | -0.013 |
| TH      | -0.003                                   | 0.160                     | -0.002 | -0.019 | 0.084  | 0.094  |        | -0.007 | -0.006 | -0.073 | -0.019 | -0.040 | -0.001 |
| SP      | -0.032                                   | 0.268                     | -0.003 | -0.032 | 0.040  | 0.017  | -0.001 |        | 0.009  | -0.073 | -0.028 | -0.032 | -0.006 |
| SBD     | 0.079                                    | 0.152                     | 0.000  | 0.004  | 0.004  | -0.004 | 0.000  | -0.004 |        | -0.035 | -0.014 | -0.012 | 0.029  |
| AAR     | 0.205                                    | -0.287                    | 0.001  | 0.034  | -0.049 | -0.040 | 0.001  | 0.011  | -0.014 |        | 0.014  | 0.002  | -0.002 |
| FWC     | -0.058                                   | 0.224                     | -0.003 | -0.025 | 0.026  | 0.033  | -0.001 | -0.016 | 0.019  | -0.048 |        | -0.047 | 0.003  |
| STKC    | 0.261                                    | -0.049                    | 0.001  | 0.009  | -0.004 | -0.066 | 0.000  | 0.004  | -0.004 | 0.002  | 0.011  |        | 0.019  |
| LL      | 0.089                                    | 0.034                     | 0.001  | 0.011  | -0.006 | -0.033 | 0.000  | 0.002  | 0.026  | -0.006 | -0.002 | 0.055  |        |

Longi, Longitude; Lati, Latitude; Ele, Elevation; AAR, annual average rainfall; STKC, Soil total potassium content; SP, Soil porosity; SBD, Soil bulk density; BD, Basal diameter; CD, Crown diameter; TH, Diameter height; LL, Leaf length; WC, Water content of fruit.

**Table S13. The result of path analysis for FY/BD of *L. cubeba***

| Factors | Path coefficient (FY/BD - response factors) |                           |        |        |        |        |        |        |        |        |       |
|---------|---------------------------------------------|---------------------------|--------|--------|--------|--------|--------|--------|--------|--------|-------|
|         | Direct path coefficient                     | Indirect path coefficient |        |        |        |        |        |        |        |        |       |
|         |                                             | FY                        | STKC   | Longi  | Lati   | LL     | SBD    | CD     | SP     | LA     | LV    |
| FY      | 0.935                                       |                           | 0.018  | -0.008 | -0.008 | 0.002  | 0.003  | -0.052 | 0.002  | 0.001  | 0.000 |
| STKC    | 0.128                                       | 0.135                     |        | 0.003  | 0.007  | 0.004  | -0.001 | 0.004  | -0.001 | 0.002  | 0.000 |
| Longi   | 0.024                                       | -0.309                    | 0.015  |        | 0.020  | -0.001 | -0.006 | 0.049  | -0.007 | -0.003 | 0.000 |
| Lati    | 0.030                                       | -0.236                    | 0.028  | 0.016  |        | 0.003  | -0.002 | 0.036  | -0.007 | 0.002  | 0.000 |
| LL      | 0.017                                       | 0.118                     | 0.027  | -0.002 | 0.005  |        | 0.005  | 0.006  | -0.001 | 0.013  | 0.001 |
| SBD     | 0.016                                       | 0.160                     | -0.006 | -0.009 | -0.003 | 0.006  |        | -0.004 | 0.001  | 0.006  | 0.000 |
| CD      | -0.156                                      | 0.313                     | -0.003 | -0.008 | -0.007 | -0.001 | 0.000  |        | 0.003  | 0.000  | 0.000 |
| SP      | 0.011                                       | 0.192                     | -0.015 | -0.016 | -0.019 | -0.001 | 0.002  | -0.038 |        | 0.001  | 0.000 |
| LA      | 0.014                                       | 0.100                     | 0.021  | -0.005 | 0.004  | 0.015  | 0.006  | -0.001 | 0.000  |        | 0.001 |
| LV      | 0.002                                       | 0.104                     | 0.001  | -0.002 | 0.000  | 0.008  | 0.000  | 0.005  | 0.000  | 0.004  |       |

Longi, Longitude; Lati, Latitude; SP, Soil porosity; SBD, Soil bulk density; STKC, Soil total potassium content; CD, Crown diameter; LA, Leaf area; LL, Leaf length; LV, Number of leaf veins; FY, fresh fruit yield.

**Table S14. The result of path analysis for EOC of *L. cubeba***

| Factors | Path coefficient (EOC - response factors) |                           |        |        |        |        |        |        |        |         |         |        |        |        |        |        |        |        |        |        |        |        |        |
|---------|-------------------------------------------|---------------------------|--------|--------|--------|--------|--------|--------|--------|---------|---------|--------|--------|--------|--------|--------|--------|--------|--------|--------|--------|--------|--------|
|         | Direct path coefficient                   | Indirect path coefficient |        |        |        |        |        |        |        |         |         |        |        |        |        |        |        |        |        |        |        |        |        |
|         |                                           | AAMaxT                    | AARH   | AAR    | STOC   | SpH    | STNC   | STPC   | SWC    | SMaxWHC | SMinWHC | SP     | Lati   | Longi  | Ele    | TH     | TFW    | TDW    | FWC    | FFPR   | FPKR   | FY     | LL     |
| AAMaxT  | 0.025                                     |                           | 0.021  | 0.024  | 0.003  | 0.008  | -0.012 | -0.002 | 0.014  | -0.006  | 0.039   | 0.008  | -0.073 | 0.010  | -0.002 | 0.001  | 0.007  | 0.012  | -0.032 | 0.002  | -0.015 | 0.000  | 0.008  |
| AARH    | -0.055                                    | -0.010                    |        | -0.011 | 0.015  | -0.021 | -0.036 | -0.012 | -0.009 | 0.004   | -0.040  | -0.065 | 0.004  | -0.031 | 0.000  | 0.000  | -0.002 | 0.002  | -0.041 | 0.032  | -0.034 | -0.001 | 0.006  |
| AAR     | 0.055                                     | 0.011                     | 0.011  |        | 0.033  | -0.006 | -0.017 | -0.025 | 0.015  | -0.005  | 0.045   | 0.048  | 0.047  | 0.075  | -0.006 | -0.003 | 0.012  | 0.001  | 0.061  | -0.033 | 0.038  | 0.004  | -0.002 |
| STOC    | -0.221                                    | 0.000                     | 0.004  | -0.008 |        | 0.007  | 0.131  | 0.095  | -0.023 | 0.019   | -0.088  | -0.040 | -0.083 | -0.031 | 0.005  | 0.003  | -0.004 | 0.004  | -0.059 | 0.033  | -0.038 | -0.002 | -0.015 |
| SpH     | 0.086                                     | 0.002                     | 0.013  | -0.004 | -0.017 |        | 0.019  | 0.037  | 0.013  | -0.005  | 0.030   | 0.031  | 0.011  | -0.002 | 0.000  | 0.000  | -0.001 | -0.007 | 0.048  | -0.024 | 0.012  | -0.002 | 0.003  |
| STNC    | 0.152                                     | -0.002                    | 0.013  | -0.006 | -0.190 | 0.011  |        | 0.078  | -0.014 | 0.015   | -0.061  | -0.013 | -0.048 | -0.011 | 0.004  | 0.002  | -0.004 | 0.002  | -0.039 | 0.029  | -0.029 | -0.001 | -0.012 |
| STPC    | 0.158                                     | 0.000                     | 0.004  | -0.009 | -0.133 | 0.020  | 0.075  |        | -0.018 | 0.015   | -0.069  | -0.040 | -0.062 | -0.033 | 0.005  | 0.002  | -0.003 | 0.004  | -0.047 | 0.028  | -0.040 | 0.000  | -0.018 |
| SWC     | -0.043                                    | -0.008                    | -0.011 | -0.019 | -0.116 | -0.027 | 0.049  | 0.066  |        | 0.025   | -0.146  | -0.095 | -0.089 | -0.051 | 0.007  | 0.002  | -0.008 | 0.005  | -0.085 | 0.042  | -0.037 | -0.003 | -0.014 |
| SMaxWHC | 0.030                                     | -0.005                    | -0.007 | -0.009 | -0.141 | -0.014 | 0.076  | 0.079  | -0.036 |         | -0.168  | -0.083 | -0.066 | -0.021 | 0.005  | 0.002  | -0.004 | 0.001  | -0.037 | 0.026  | -0.025 | 0.000  | -0.019 |
| SMinWHC | -0.187                                    | -0.005                    | -0.012 | -0.013 | -0.104 | -0.014 | 0.050  | 0.058  | -0.033 | 0.027   |         | -0.090 | -0.077 | -0.033 | 0.006  | 0.001  | -0.006 | 0.002  | -0.058 | 0.031  | -0.029 | -0.001 | -0.016 |
| SP      | -0.134                                    | -0.001                    | -0.027 | -0.020 | -0.067 | -0.020 | 0.015  | 0.047  | -0.031 | 0.018   | -0.126  |        | -0.123 | -0.070 | 0.006  | 0.002  | -0.006 | 0.013  | -0.127 | 0.066  | -0.071 | -0.005 | -0.004 |
| Lati    | 0.189                                     | -0.010                    | -0.001 | 0.014  | 0.097  | 0.005  | -0.039 | -0.052 | 0.020  | -0.011  | 0.076   | 0.087  |        | 0.071  | -0.007 | -0.004 | 0.006  | -0.017 | 0.152  | -0.060 | 0.076  | 0.007  | 0.010  |
| Longi   | 0.105                                     | 0.002                     | 0.016  | 0.039  | 0.065  | -0.002 | -0.016 | -0.050 | 0.021  | -0.006  | 0.059   | 0.089  | 0.128  |        | -0.008 | -0.004 | 0.014  | -0.009 | 0.145  | -0.063 | 0.079  | 0.009  | -0.005 |
| Ele     | 0.010                                     | -0.004                    | -0.003 | -0.034 | -0.112 | 0.003  | 0.057  | 0.075  | -0.029 | 0.016   | -0.116  | -0.077 | -0.130 | -0.081 |        | 0.003  | -0.016 | 0.003  | -0.120 | 0.039  | -0.047 | -0.006 | -0.012 |
| TH      | 0.009                                     | 0.002                     | 0.001  | -0.020 | -0.066 | 0.004  | 0.040  | 0.040  | -0.011 | 0.006   | -0.027  | -0.031 | -0.080 | -0.042 | 0.003  |        | -0.003 | 0.010  | -0.084 | 0.038  | -0.053 | -0.006 | -0.001 |
| TFW     | -0.037                                    | -0.004                    | -0.004 | -0.017 | -0.025 | 0.001  | 0.017  | 0.014  | -0.009 | 0.003   | -0.031  | -0.020 | -0.033 | -0.039 | 0.004  | 0.001  |        | -0.023 | -0.098 | 0.042  | -0.036 | -0.003 | 0.008  |
| TDW     | -0.043                                    | -0.007                    | 0.003  | -0.002 | 0.022  | 0.014  | -0.006 | -0.014 | 0.005  | -0.001  | 0.008   | 0.041  | 0.074  | 0.023  | -0.001 | -0.002 | -0.020 |        | 0.144  | -0.064 | 0.076  | 0.002  | 0.004  |
| FWC     | -0.261                                    | 0.003                     | -0.009 | -0.013 | -0.050 | -0.016 | 0.023  | 0.028  | -0.014 | 0.004   | -0.042  | -0.065 | -0.110 | -0.058 | 0.005  | 0.003  | -0.014 | 0.024  |        | 0.120  | -0.123 | -0.004 | 0.002  |
| FFPR    | 0.161                                     | 0.000                     | -0.011 | -0.011 | -0.046 | -0.013 | 0.028  | 0.028  | -0.011 | 0.005   | -0.036  | -0.055 | -0.071 | -0.041 | 0.002  | 0.002  | -0.010 | 0.017  | -0.194 |        | -0.159 | -0.002 | -0.001 |
| FPKR    | -0.175                                    | 0.002                     | -0.011 | -0.012 | -0.048 | -0.006 | 0.025  | 0.036  | -0.009 | 0.004   | -0.031  | -0.055 | -0.082 | -0.047 | 0.003  | 0.003  | -0.008 | 0.019  | -0.183 | 0.146  |        | -0.002 | 0.000  |
| FY      | -0.026                                    | 0.000                     | -0.002 | -0.009 | -0.013 | 0.008  | 0.003  | 0.003  | -0.004 | 0.000   | -0.010  | -0.027 | -0.048 | -0.035 | 0.002  | 0.002  | -0.004 | 0.003  | -0.039 | 0.014  | -0.016 |        | 0.008  |
| LL      | 0.060                                     | 0.003                     | -0.005 | -0.002 | 0.053  | 0.004  | -0.030 | -0.047 | 0.010  | -0.010  | 0.051   | 0.010  | 0.031  | -0.009 | -0.002 | 0.000  | -0.005 | -0.003 | -0.010 | -0.002 | 0.001  | -0.003 |        |

Longi, Longitude; Lati, Latitude; Ele, Elevation; AAMaxT, Annual average maximum temperature; AAR, annual average rainfall; AARH, annual average relative humidity; SWC, Soil Water content; SP, Soil porosity; SpH, Soil pH; SMaxWHC, Soil Maximum water holding capacity; SMinWHC, Soil Minimum water holding capacity; STOC, Soil total carbon content; STNC, Soil total nitrogen content; STPC, Soil total phosphorus content; TH, Diameter height; LL, Leaf length; TFW, Thousand-grain fresh weight; TDW, Thousand-grain dry weight; FPKR, Fresh pulp kernel ratio; FFPR, Fresh fruit pulp rate; FWC, Water content of fruit; FY, fresh fruit yield.

**Table S15. The result of path analysis for EOY of *L. cubeba***

| Factors | Path coefficient (EOY - response factors) |                           |        |        |        |        |        |        |        |        |        |        |        |        |        |
|---------|-------------------------------------------|---------------------------|--------|--------|--------|--------|--------|--------|--------|--------|--------|--------|--------|--------|--------|
|         | Direct path coefficient                   | Indirect path coefficient |        |        |        |        |        |        |        |        |        |        |        |        |        |
|         |                                           | FY                        | CD     | Longi  | BD     | SBD    | SpH    | TH     | STKC   | LL     | AAR    | LA     | Ele    | Lati   | SP     |
| FY      | 0.886                                     |                           | 0.030  | -0.001 | -0.011 | 0.017  | 0.010  | 0.000  | 0.004  | -0.001 | -0.003 | 0.000  | -0.001 | -0.031 | 0.000  |
| CD      | 0.091                                     | 0.297                     |        | -0.001 | -0.017 | 0.003  | 0.001  | 0.001  | -0.001 | 0.000  | -0.005 | 0.000  | -0.001 | -0.028 | 0.000  |
| Longi   | 0.004                                     | -0.292                    | -0.029 |        | 0.008  | -0.036 | -0.002 | -0.001 | 0.004  | 0.000  | 0.012  | 0.001  | 0.002  | 0.082  | -0.001 |
| BD      | -0.037                                    | 0.253                     | 0.043  | -0.001 |        | -0.002 | 0.010  | 0.001  | -0.009 | 0.001  | -0.003 | 0.000  | -0.001 | -0.028 | 0.000  |
| SBD     | 0.097                                     | 0.152                     | 0.002  | -0.002 | 0.001  |        | 0.004  | 0.000  | -0.001 | -0.002 | -0.003 | -0.001 | 0.000  | -0.012 | 0.000  |
| SpH     | 0.107                                     | 0.085                     | 0.001  | 0.000  | -0.004 | 0.003  |        | 0.000  | 0.001  | 0.000  | -0.001 | 0.000  | 0.000  | 0.007  | 0.000  |
| TH      | 0.002                                     | 0.198                     | 0.046  | -0.002 | -0.015 | -0.007 | 0.005  |        | -0.005 | 0.000  | -0.006 | 0.000  | -0.001 | -0.052 | 0.000  |
| STKC    | 0.030                                     | 0.128                     | -0.002 | 0.000  | 0.011  | -0.004 | 0.004  | 0.000  |        | -0.001 | 0.000  | 0.000  | 0.000  | 0.027  | 0.000  |
| LL      | -0.005                                    | 0.112                     | -0.003 | 0.000  | 0.005  | 0.032  | 0.005  | 0.000  | 0.006  |        | 0.000  | -0.003 | 0.001  | 0.020  | 0.000  |
| AAR     | 0.017                                     | -0.149                    | -0.027 | 0.003  | 0.006  | -0.017 | -0.007 | -0.001 | 0.000  | 0.000  |        | 0.001  | 0.002  | 0.031  | -0.001 |
| LA      | -0.003                                    | 0.095                     | 0.001  | -0.001 | 0.004  | 0.039  | -0.010 | 0.000  | 0.005  | -0.005 | -0.003 |        | 0.000  | 0.015  | 0.000  |
| Ele     | -0.003                                    | 0.200                     | 0.023  | -0.003 | -0.010 | -0.007 | 0.004  | 0.001  | -0.005 | 0.001  | -0.010 | 0.000  |        | -0.084 | 0.001  |
| Lati    | 0.122                                     | -0.223                    | -0.021 | 0.003  | 0.008  | -0.009 | 0.006  | -0.001 | 0.007  | -0.001 | 0.004  | 0.000  | 0.002  |        | -0.001 |
| SP      | 0.002                                     | 0.182                     | 0.022  | -0.003 | -0.003 | 0.012  | -0.025 | 0.000  | -0.004 | 0.000  | -0.006 | 0.000  | -0.002 | -0.079 |        |

Longi, Longitude; Lati, Latitude; Ele, Elevation; AAR, annual average rainfall; SP, Soil porosity; SpH, Soil pH; SBD, Soil bulk density; STKC, Soil total potassium content; BD, Basal diameter; CD, Crown diameter; TH, Diameter height; LA, Leaf area; LL, Leaf length; FY, fresh fruit yield.



**Table S16. The result of path analysis for EOY/BD of *L. cubeba***

| Factors | Path coefficient (EOY/BD - response factors) |                           |        |        |        |        |        |        |        |        |        |        |         |        |
|---------|----------------------------------------------|---------------------------|--------|--------|--------|--------|--------|--------|--------|--------|--------|--------|---------|--------|
|         | Direct path coefficient                      | Indirect path coefficient |        |        |        |        |        |        |        |        |        |        |         |        |
|         |                                              | FY                        | FY.BD  | EOP    | STKC   | SBD    | SpH    | LL     | CD     | LA     | Longi  | LW     | SMaxWHC | EOC    |
| FY      | -0.982                                       |                           | 0.869  | 0.896  | -0.001 | 0.003  | 0.001  | 0.001  | 0.001  | 0.001  | -0.001 | 0.001  | 0.000   | -0.002 |
| FY/BD   | 0.965                                        | -0.885                    |        | 0.819  | -0.002 | 0.003  | 0.001  | 0.001  | 0.001  | 0.001  | -0.001 | 0.001  | 0.000   | -0.001 |
| EOY     | 0.982                                        | -0.896                    | 0.805  |        | -0.001 | 0.005  | 0.003  | 0.001  | 0.001  | 0.001  | -0.001 | 0.001  | 0.000   | 0.001  |
| STKC    | -0.007                                       | -0.141                    | 0.257  | 0.175  |        | -0.001 | 0.000  | 0.002  | 0.000  | 0.001  | 0.000  | 0.001  | 0.000   | 0.002  |
| SBD     | 0.020                                        | -0.168                    | 0.160  | 0.238  | 0.000  |        | 0.000  | 0.003  | 0.000  | 0.003  | -0.001 | 0.004  | 0.001   | 0.000  |
| SpH     | 0.013                                        | -0.094                    | 0.094  | 0.199  | 0.000  | 0.001  |        | 0.000  | 0.000  | -0.001 | 0.000  | -0.002 | 0.000   | 0.003  |
| LL      | 0.009                                        | -0.124                    | 0.160  | 0.158  | -0.001 | 0.007  | 0.001  |        | 0.000  | 0.006  | 0.000  | 0.008  | 0.000   | 0.002  |
| CD      | 0.004                                        | -0.329                    | 0.149  | 0.356  | 0.000  | 0.001  | 0.000  | 0.000  |        | 0.000  | -0.001 | 0.000  | 0.000   | -0.002 |
| LA      | 0.007                                        | -0.105                    | 0.129  | 0.136  | -0.001 | 0.008  | -0.001 | 0.008  | 0.000  |        | -0.001 | 0.010  | 0.000   | 0.001  |
| Longi   | 0.003                                        | 0.324                     | -0.216 | -0.270 | -0.001 | -0.008 | 0.000  | -0.001 | -0.001 | -0.001 |        | -0.002 | 0.000   | 0.007  |
| LW      | 0.010                                        | -0.078                    | 0.105  | 0.108  | -0.001 | 0.009  | -0.002 | 0.007  | 0.000  | 0.007  | -0.001 |        | 0.000   | 0.001  |
| SMaxWHC | -0.001                                       | -0.001                    | -0.028 | -0.103 | 0.000  | -0.013 | -0.002 | -0.003 | 0.001  | -0.002 | -0.001 | -0.003 |         | -0.005 |
| EOC     | 0.015                                        | 0.145                     | -0.093 | 0.050  | -0.001 | 0.001  | 0.003  | 0.001  | 0.000  | 0.000  | 0.001  | 0.001  | 0.000   |        |

Longi, Longitude; SpH, Soil pH; SBD, Soil bulk density; STKC, Soil total potassium content; SMaxWHC, Soil Maximum water holding capacity; CD, Crown diameter; LA, Leaf area; LL, Leaf length; LW, Leaf width; FY, fresh fruit yield; FY/BD, Fruit yield/ Basal diameter; EOC, Essential oil content; EOY, Essential oil yield.

**Table S17. Results on detrended correspondence analysis of environmental factors**

| Statistic            | DCA1  | DCA2  | DCA3  | DCA4  |
|----------------------|-------|-------|-------|-------|
| Eigenvalues          | 0.165 | 0.054 | 0.014 | 0.013 |
| Additive Eigenvalues | 0.165 | 0.049 | 0.012 | 0.011 |
| Decorana values      | 0.183 | 0.034 | 0.009 | 0.008 |
| Axis lengths         | 1.488 | 1.149 | 0.577 | 0.613 |

The gradient length of sorting axis were all less than 3, so that the raw data can be used by the redundancy analysis belonging to the linear model.

**Table 18. redundancy analysis (RDA) results for Phenotypic characteristics of *L. cubeba* with environmental factors**

|                       | RDA1   | RDA2   | RDA3      | RDA4   | Total |
|-----------------------|--------|--------|-----------|--------|-------|
| Eigenvalue            | 2.343  | 1.886  | 0.897     | 0.588  |       |
| Proportion Explained  | 0.117  | 0.094  | 0.045     | 0.029  | 79.19 |
| Cumulative Proportion | 0.117  | 0.211  | 0.256     | 0.286  |       |
| AAT                   | 0.201  | -0.223 | -0.163    | -0.207 |       |
| AAMaxT                | 0.167  | -0.076 | -0.209    | -0.234 |       |
| AAMinT                | 0.275  | -0.284 | -0.087    | -0.136 |       |
| AARH                  | 0.304  | 0.055  | 0.141     | 0.394  |       |
| AAR                   | -0.455 | -0.174 | 0.205     | -0.162 |       |
| STOC                  | 0.070  | 0.581  | -0.189    | -0.233 |       |
| SpH                   | -0.090 | -0.145 | -0.353    | -0.598 |       |
| STNC                  | -0.009 | 0.480  | -0.198    | -0.247 |       |
| STPC                  | -0.048 | 0.569  | -0.116    | -0.504 |       |
| STKC                  | 0.011  | -0.307 | 0.445     | -0.424 |       |
| SWC                   | 0.182  | 0.579  | 0.164     | 0.059  |       |
| SBD                   | 0.521  | -0.308 | 0.246     | 0.085  |       |
| SMaxWHC               | -0.086 | 0.581  | -0.034    | -0.060 |       |
| SMinWHC               | 0.035  | 0.541  | 0.080     | 0.036  |       |
| SP                    | 0.522  | 0.518  | 0.234     | 0.033  |       |
| Lati                  | -0.511 | -0.702 | 0.076     | 0.128  |       |
| Longi                 | -0.798 | -0.370 | 0.063     | 0.019  |       |
| Ele                   | 0.360  | 0.597  | -0.160    | -0.006 |       |
| Model                 |        |        | 0.001 *** |        |       |

\*\*\*, significant in 0.001 level; AAT, Annual average temperature; AAMaxT, Annual average maximum temperature; AAMinT, annual average minimum temperature; AAR, annual average rainfall; AARH, annual average relative humidity; SWC, Soil water content; SBD, Soil bulk density; SP, Soil porosity; SMaxWHC, Soil Maximum water holding capacity; SMinWHC, Soil Minimum water holding capacity; STOC, Soil total carbon content; SpH, Soil pH; STNC, Soil total nitrogen content; STPC, Soil total phosphorus content; STKC, Soil total potassium content.
